# Supplementary material
Source: PubMed Central journal article supplement (PMC3785887)
Supplement: mmc1.pdf [file mmc1.pdf]

# **Molecular Recognition of CXCR4 by a Dual Tropic HIV-1 gp120 V3 Loop**

## **Supporting Material**

Phanourios Tamamis and Christodoulos A. Floudas

Department of Chemical and Biological Engineering, Princeton University, New Jersey

## Supporting Text

### Supporting Material on Methods, Step2 :

V3 loop: We employed 16 replicas with the following temperatures: 288, 300, 312, 325, 338, 352, 366, 381, 396, 412, 428, 445, 462, 480, 498, 517 K. Replica exchanges were attempted at 10-ps intervals and the total simulation length for all temperatures was equal to 0.8 $\mu$ s. We extracted 5000 snapshots (conformations), at 10-ps intervals, from the 50 ns replica simulations at 300 K. The peptide dielectric constant was set to  $\epsilon=2$  and a non-polar solvation energy surface term was included, with a surface-tension coefficient of 0.015 kcal/mol\* $\text{\AA}^2$ ; in addition, 7.5- $\text{\AA}$  cutoff was used for the non-bonded interactions in conjunction with the FACTS19 parametrization<sup>1</sup>. The peptide atomic charges, van der Waals and stereochemical parameters were taken from the CHARMM19 all-atom force field<sup>2</sup> in consistency with the FACTS 19 parametrization<sup>1</sup>. The equations of motion were integrated by the leap-frog algorithm, with a 2.0-fs timestep. Bonds involving hydrogen atoms were constrained to standard values with the SHAKE algorithm<sup>3</sup>. The temperature was controlled by the Langevin method; the friction coefficients were set to 5.0 ps<sup>-1</sup> for heavy atoms and 0 ps<sup>-1</sup> for hydrogen atoms.

CXCR4: Standard amino acids were described by the CHARMM27 all-atom topology and energy function<sup>4</sup> including the CMAP correction<sup>5</sup>. Sulfated tyrosine residues 7, 12, 21, denoted as “Tys”, were parametrized using a combination of the standard tyrosine parameters and the methylsulfate parameters presented in CHARMM36 CGENFF force field<sup>6</sup>. A 16- $\text{\AA}$  cutoff distance was used for non-bonded interactions. The lengths of covalent bonds containing hydrogen atoms were constrained by the *SHAKE* algorithm<sup>3</sup>, and the equations of motion were solved with an integration time step of 2.0 fs. The system was in contact with a Langevin heat bath at 300 K during the production and equilibration runs, and in addition, a friction coefficient of 5 ps<sup>-1</sup> was used for heavy atoms. Prior to the production runs, four heating steps of total duration 400 ps were performed, and in addition, an equilibration procedure of a total duration of 1.7 ns was performed, during which the harmonic restraints were gradually removed. The production runs were performed at 300K with a total duration of 5 ns. The difference between the two independent simulations per complex was on the restraints imposed during the production runs: in the first simulation, no restraints were imposed on the system, whereas in the

second simulation, a weak harmonic force constant of 1 kcal/mol\*Å<sup>2</sup> was applied to the C $\alpha$  atoms using the bestfit module in CHARMM<sup>8</sup>.

### **Supporting Material on Methods, Step3 :**

We merged the structures produced in the V3 loop replica exchange MD simulations in a single trajectory containing 5000 V3 loop structures. In addition, we merged the CXCR4 structures produced from the six independent aforesaid MD simulations in single trajectory containing 1500 CXCR4 structures. We employed the quality clustering method of WORDOM<sup>7</sup>, to cluster independently the V3 loop and CXCR4 structures based on their C $\alpha$  coordinates. For the V3 loop clustering, we included all C $\alpha$  atoms and used a relatively large clustering radius of 2.0 Å, owing to the high flexibility of the V3 loop structures. We extracted the 20 most populated clusters for the V3 loop, with the smallest cluster acquiring a 0.09% percentage probability. For the CXCR4 clustering, we considered all C $\alpha$  atoms with a z-coordinate value greater than 0 Å. The cluster analysis produced 17 clusters for CXCR4, including the initially modeled CXCR4 structure.

### **Supporting Material on Methods, Step5 :**

In the PB calculations, we inserted the complex and protein in a membrane slab with a thickness of 31 Å (31 $\approx$ 36.0-2\*(2.5), where 36.0 Å and 2.5 Å correspond to the membrane thickness and the half of membrane switching length, parameters used in the GBSW approximation). The membrane slab used in the PBSA calculations possessed a dielectric constant of 2, and was surrounded by water, with a dielectric constant of 80. The protein dielectric constant was set to 2. The PBSA calculations were performed with the Poisson-Boltzmann solver of the CHARMM program (PBEQ module)<sup>8</sup>. We used 250 grid points in each direction and a grid-spacing of 0.5 Å.

It is worth noting that in the initial set of 680,000 complexes, the docking of V3 loop performed by Zdock<sup>9</sup> was not in all cases in accordance with the experimentally defined binding pocket of CXCR4<sup>10</sup>. Nevertheless, the binding free energy calculations showed that the binding free energies of the complex structures at which the V3 loop was outside of the binding pocket, was evidently higher compared to the binding free energy of the 17 complexes selected.

***CXCR4 and V3 loop domains:***

CXCR4 residues, denoted in brackets, can be approximately divided into the following domains: (i) N-terminal domain [1:37], (ii) Intramembrane helix 1 [38:65]; (iii) Intracellular loop 1 [66:71]; (iv) Intramembrane helix 2 [72:100], (v) Extracellular loop 1 (ECL1) [101:106]; (vi) Intramembrane helix 3 [107:137]; (vii) Intracellular loop 2 [138:146]; (viii) Intramembrane helix 4 [147:174]; (ix) Extracellular loop 2 (ECL2) [175:194]; (x) Intramembrane helix 5 [195:224]; (xi) Intracellular loop 3 [225:236]; (xii) Intramembrane helix 6 [237:265]; (xiii) Extracellular loop 3 (ECL3) [266:276]; (xiv) Intramembrane helix 7 [277:303]; (xv) C-terminal domain [304:352]. Regarding the V3 loop, the structure can be approximately divided into the following regions: (i) The base domain [1:4 and 31:35]; (ii) Stems [5:12 and 23:30] (iii) Tip [13:22]. According to the results of this study, the core region of the tip comprises residues 16-20.

## Supporting Figures

### Supporting Figure 1:

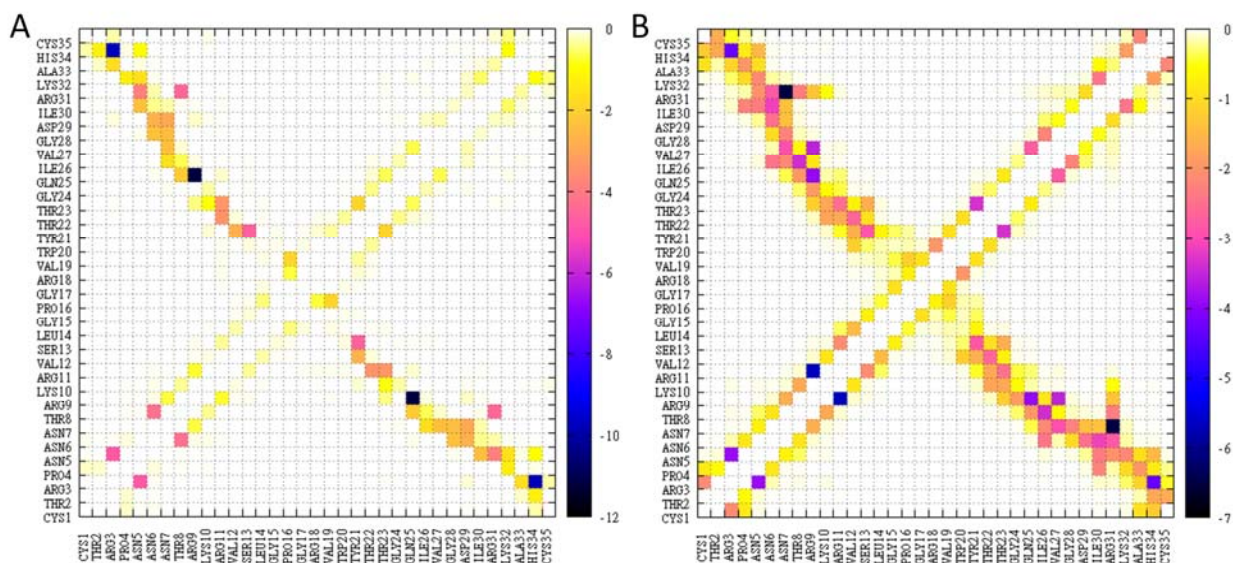

**Supporting Figure 1:** Two dimensional density maps depicting the favorable (negative) average MM GBSA interaction free-energies for intramolecular V3 loop interacting residue pairs, within the simulation of the complex with the lowest average binding free energy. The left (A) and right (B) panels correspond, respectively, to polar and non-polar interactions. All energies are in kcal/mol. The color – interaction free energy correspondence is shown by the palette on the right-hand side of each panel. Interactions free energies were not calculated for pairs of covalently bonded residues. All values have been computed by analysis of 1000 snapshots, extracted from the 20-ns simulation of complex 1 at 20-ps intervals.

# Supporting Figure 2:

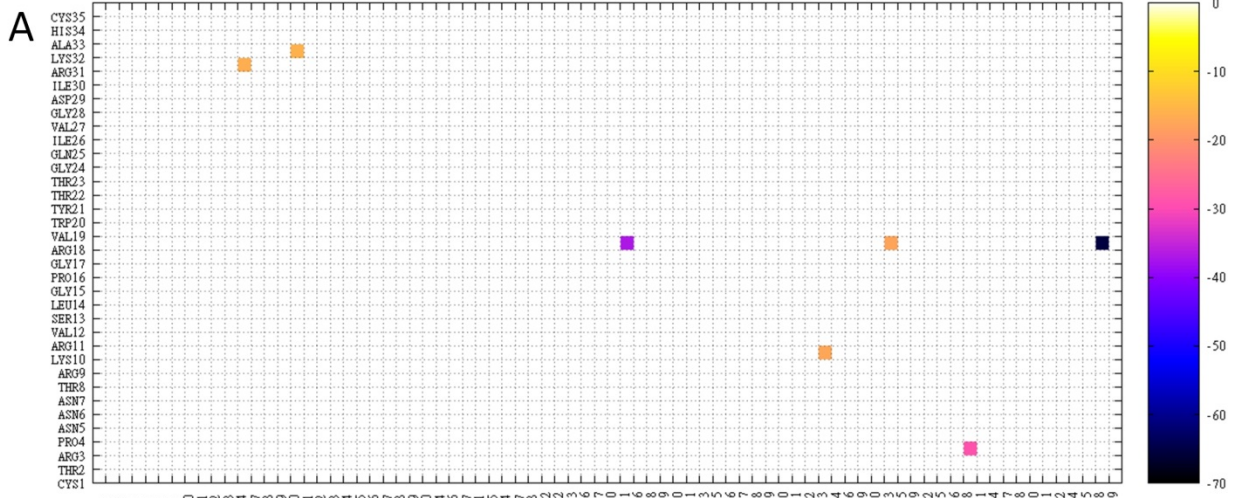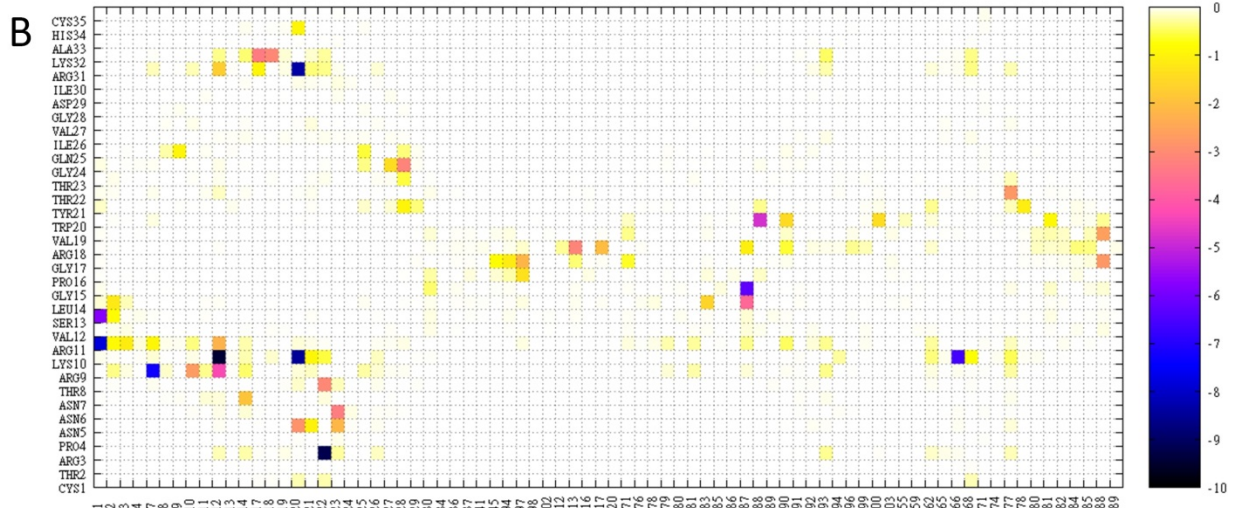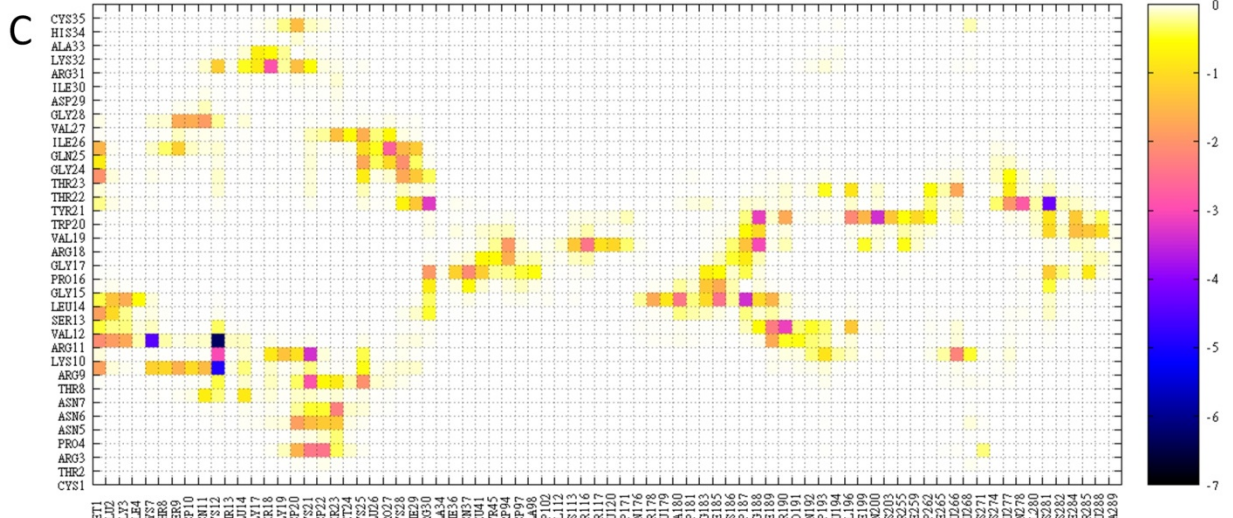

**Supporting Figure 2:** Two dimensional density maps depicting the favorable (negative) average MM GBSA interaction free-energies for intermolecular V3 loop (y axis) : CXCR4 (x axis) interacting residue pairs, within the simulation of the complex with the lowest average binding free energy. The upper (A), middle (B) and bottom (C) panels correspond, respectively, to highly interacting polar [-70 kcal/mol : -10 kcal/mol], moderate interacting polar [-10 kcal/mol : 0 kcal/mol], and non-polar interactions. All energies are in kcal/mol. The color – interaction free energy correspondence is shown by the palette on the right-hand side of each panel. All values have been computed by analysis of 1000 snapshots, extracted from the 20-ns simulation of complex 1 at 20-ps intervals.

## Supporting Tables

### Supporting Table 1:

Binding free energies using the PBSA, MM GBSA and MM PBSA approximations for V3 loop : CXCR4 complexes in kcal/mol. All values have been computed by analysis of 1000 snapshots, extracted from the 20-ns simulation (of all complexes) at 20-ps intervals.

|                | Docking and Minimization <sup>¶</sup> |       |        | MD Simulations <sup>†</sup>            |                                        |                      |               |                                        |  |
|----------------|---------------------------------------|-------|--------|----------------------------------------|----------------------------------------|----------------------|---------------|----------------------------------------|--|
|                | PBSA                                  |       |        | MM PB/GBSA<br>(Non-Polar) <sup>‡</sup> | MM GBSA <sup>‡</sup> (Polar and Total) |                      |               | MM PBSA <sup>#</sup> (Polar and Total) |  |
|                | Non-Polar                             | Polar | Total  | Non-polar                              | Polar                                  | Total                | Polar         | Total                                  |  |
| 1 <sup>§</sup> | -134.3                                | -10.0 | -144.2 | -269.0 (10.2)                          | -157.9 (19.8)                          | <b>-427.0 (22.4)</b> | -98.1 (11.1)  | <b>-367.2 (12.9)</b>                   |  |
| 2              | -124.0                                | -19.8 | -143.8 | -230.7 (19.9)                          | -99.3 (11.4)                           | -330.1 (22.1)        | -47.8 (16.1)  | -278.5 (15.5)                          |  |
| 3              | -98.9                                 | -44.7 | -143.5 | -210.8 (16.1)                          | -123.8 (13.4)                          | -334.6 (19.6)        | -105.5 (9.3)  | -316.3 (16.3)                          |  |
| 4              | -130.4                                | -12.2 | -142.6 | -269.3 (12.3)                          | -124.6 (13.8)                          | -393.8 (13.9)        | -86.2 (10.5)  | -355.5 (12.4)                          |  |
| 5              | -138.3                                | -4.0  | -142.3 | -225.5 (11.5)                          | -111.3 (22.0)                          | -336.9 (28.2)        | -49.7 (9.8)   | -275.2 (10.5)                          |  |
| 6              | -121.3                                | -19.9 | -141.2 | -225.7 (10.9)                          | -122.4 (14.7)                          | -348.2 (14.8)        | -73.0 (9.1)   | -298.7 (12.3)                          |  |
| 7              | -94.3                                 | -46.6 | -140.9 | -229.2 (15.2)                          | -102.7 (16.7)                          | -331.9 (21.7)        | -85.9 (10.2)  | -315.1 (15.6)                          |  |
| 8              | -99.4                                 | -39.5 | -138.9 | -231.8 (14.3)                          | -96.3 (15.2)                           | -328.2 (16.3)        | -43.9 (15.4)  | -275.8 (12.6)                          |  |
| 9              | -108.4                                | -28.4 | -136.8 | -233.6 (16.6)                          | -105.1 (13.3)                          | -338.6 (17.8)        | -80.9 (12.5)  | -314.4 (19.0)                          |  |
| 10             | -138.1                                | 1.6   | -136.5 | -223.1 (10.0)                          | -62.3 (15.9)                           | -285.4 (19.5)        | -25.8 (10.5)  | -248.9 (13.6)                          |  |
| 11             | -119.6                                | -16.6 | -136.2 | -253.1 (10.4)                          | -107.3 (16.8)                          | -360.5 (16.0)        | -80.1 (12.0)  | -333.3 (13.9)                          |  |
| 12             | -123.5                                | -12.3 | -135.8 | -245.0 (12.4)                          | -134.9 (14.4)                          | -379.9 (16.2)        | -109.6 (13.1) | -354.6 (16.2)                          |  |
| 13             | -137.8                                | 2.0   | -135.8 | -235.0 (13.5)                          | -142.3 (18.3)                          | -377.3 (23.8)        | -63.3 (21.0)  | -298.2 (16.0)                          |  |
| 14             | -98.2                                 | -37.3 | -135.5 | -217.2 (14.3)                          | -142.4 (16.8)                          | -359.6 (23.7)        | -102.5 (10.4) | -319.7 (18.6)                          |  |
| 15             | -125.4                                | -9.9  | -135.4 | -239.7 (8.8)                           | -112.5 (15.8)                          | -352.2 (16.4)        | -67.5 (8.7)   | -307.2 (11.0)                          |  |
| 16             | -136.6                                | 2.0   | -134.6 | -246.9 (12.8)                          | -109.1 (14.7)                          | -356 (18.0)          | -49.1 (9.7)   | -296.0 (15.1)                          |  |
| 17             | -136.5                                | 2.5   | -134.1 | -233.0 (12.3)                          | -113.4 (14.3)                          | -346.4 (20.0)        | -59.9 (9.8)   | -292.9 (10.9)                          |  |

The binding free energies are calculated as described in Methods. The numbering<sup>§</sup> (1-17) is sorted according to the total binding free energy, using the PBSA approximation, of the docked complexes after minimization, referred as step 5<sup>¶</sup>; the total binding free energy is the sum of non-polar and polar contributions of step 5. The MD simulation<sup>†</sup> results correspond the average binding free energies of the 17 complexes based on 20-ns MD simulation runs, referred as step 7, and were calculated both using MM PBSA<sup>‡</sup> and MM GBSA<sup>#</sup> methods.; the standard deviation is shown in parentheses. The non-polar component<sup>‡</sup> is the same in MM PBSA<sup>‡</sup> and MM GBSA<sup>#</sup>. For each calculation, MM GBSA<sup>‡</sup> or MM PBSA<sup>#</sup>, the polar component is calculated using a different approach, thus, the total binding free energy, which is the sum of polar and non-polar



components for each approach is different, as well. According to both methods, the average total binding free energy of the first complex, marked in **bold** face, is the lowest.

**Supporting Table 2:**

Average and standard deviation values of Root Mean Square Deviation (RMSD) between the simulation coordinates of main-chain heavy atoms (N, C $\alpha$ , and C) and their corresponding coordinates from the first simulation frame after equilibration. All values have been computed by analysis of 1000 snapshots (per complex), extracted from the 20-ns simulations at 20-ps intervals.

| Complex | Protein Intramembrane |               | Protein N-terminal, residues 1 -37 |               | V3 loop |               | V3 loop, residues: 8-26 |               |
|---------|-----------------------|---------------|------------------------------------|---------------|---------|---------------|-------------------------|---------------|
|         | Average               | St. Deviation | Average                            | St. Deviation | Average | St. Deviation | Average                 | St. Deviation |
| 1       | 1.31                  | 0.03          | 3.65                               | 0.29          | 3.86    | 0.27          | 2.9                     | 0.14          |
| 2       | 1.09                  | 0.01          | 3.34                               | 0.28          | 4.99    | 0.91          | 3.57                    | 0.31          |
| 3       | 1.32                  | 0.07          | 4.5                                | 0.65          | 5.61    | 0.75          | 3.15                    | 1.44          |
| 4       | 1.16                  | 0.02          | 2.92                               | 0.1           | 2.12    | 0.16          | 1.56                    | 0.04          |
| 5       | 0.93                  | 0.01          | 2.06                               | 0.11          | 5.14    | 0.36          | 1.79                    | 0.07          |
| 6       | 1.11                  | 0.02          | 3.3                                | 0.4           | 3.5     | 0.29          | 2.77                    | 0.18          |
| 7       | 1.33                  | 0.03          | 7.43                               | 0.59          | 7.02    | 1.76          | 3.04                    | 0.42          |
| 8       | 1.19                  | 0.02          | 2.96                               | 0.25          | 8.01    | 0.86          | 2.52                    | 0.15          |
| 9       | 1.17                  | 0.01          | 3.96                               | 0.35          | 6.8     | 0.48          | 5                       | 0.29          |
| 10      | 0.95                  | 0.02          | 3.51                               | 0.45          | 4.34    | 2.41          | 1.71                    | 0.15          |
| 11      | 1.06                  | 0.01          | 3.76                               | 0.15          | 4.48    | 0.24          | 3.53                    | 0.2           |
| 12      | 1.09                  | 0.02          | 2.39                               | 0.1           | 4.27    | 0.51          | 2.73                    | 0.09          |
| 13      | 1.22                  | 0.02          | 3.78                               | 0.43          | 5.42    | 3.69          | 1.58                    | 0.09          |
| 14      | 1.29                  | 0.05          | 4.63                               | 0.39          | 5.27    | 0.47          | 4.62                    | 0.52          |
| 15      | 1.04                  | 0.01          | 2.99                               | 0.14          | 5.43    | 1.29          | 1.78                    | 0.08          |
| 16      | 1.16                  | 0.01          | 2.04                               | 0.07          | 8.05    | 2.36          | 1.32                    | 0.04          |
| 17      | 1.09                  | 0.01          | 1.87                               | 0.05          | 3.82    | 0.16          | 2.23                    | 0.07          |

The coordinates of the simulated systems are aligned with regard to the intramembrane backbone CXCR4 atoms of the first simulation frame. All values corresponding to protein N-terminal, V3 loop and V3 loop residues 8-26, are computed without any additional rotation/translation and are averaged over the 20 ns of the simulation trajectories. All values are reported in Å.

**Supporting Table 3:**

Percentage (%) hydrogen bond occupancy of important intermolecular hydrogen-bonding atom pairs within the 17 simulated complexes. Hydrogen bonding atom pairs with less than 10% are not reported. We present the hydrogen bond occupancies for each complex in a separate table and sort the hydrogen bonding atom pairs, firstly, with respect to the residue number of the V3 loop atom, and secondly, the residue number of the CXCR4 atom. All values have been computed by analysis of 1000 snapshots (per complex), extracted from the 20-ns simulations at 20-ps intervals. A hydrogen bond was present if the donor (D)–acceptor (A) distance was less than 3.5 Å and the corresponding angle (D–H ... A) was larger than 90°. Hydrogen bond interactions associated with salt-bridge formation are highlighted in grey background.

## Complex 1:

| V3 loop Residue | Number | Group | Atom | CXCR4 Residue | Number | Group | Atom | Occupancy (%) |
|-----------------|--------|-------|------|---------------|--------|-------|------|---------------|
| ARG             | 3      | Side  | NH2  | ASP           | 22     | Side  | OD1  | 40.86         |
| ARG             | 3      | Side  | NH2  | ASP           | 22     | Side  | OD2  | 40.66         |
| ARG             | 3      | Side  | NH2  | GLU           | 268    | Side  | OE2  | 87.81         |
| ARG             | 3      | Side  | NH1  | GLU           | 268    | Side  | OE1  | 87.21         |
| ARG             | 3      | Side  | NH2  | GLU           | 268    | Side  | OE1  | 64.54         |
| ARG             | 3      | Side  | NH1  | GLU           | 268    | Side  | OE2  | 60.94         |
| ASN             | 5      | Side  | ND2  | ASP           | 20     | Side  | OD1  | 52.75         |
| ASN             | 5      | Side  | ND2  | ASP           | 20     | Side  | OD2  | 12.79         |
| ASN             | 5      | Side  | ND2  | TYS           | 21     | Main  | O    | 23.08         |
| ASN             | 6      | Main  | N    | SER           | 23     | Side  | OG   | 68.73         |
| ASN             | 6      | Side  | OD1  | SER           | 23     | Side  | OG   | 18.08         |
| ASN             | 6      | Side  | ND2  | SER           | 23     | Side  | OG   | 9.69          |
| ASN             | 7      | Side  | OD1  | ASN           | 11     | Side  | ND2  | 11.39         |
| ASN             | 7      | Side  | ND2  | GLU           | 14     | Side  | OE1  | 35.16         |
| ASN             | 7      | Side  | ND2  | GLU           | 14     | Side  | OE2  | 18.98         |
| THR             | 8      | Side  | OG1  | ASP           | 22     | Main  | O    | 61.04         |
| ARG             | 9      | Side  | NH1  | TYS           | 7      | Main  | O    | 84.62         |
| ARG             | 9      | Side  | NH2  | TYS           | 7      | Main  | O    | 57.14         |
| ARG             | 9      | Side  | NH1  | ASP           | 10     | Main  | O    | 65.13         |
| LYS             | 10     | Main  | N    | TYS           | 12     | Side  | OS3  | 85.71         |
| LYS             | 10     | Main  | N    | TYS           | 12     | Side  | OS2  | 11.09         |
| LYS             | 10     | Side  | NZ   | ASP           | 20     | Main  | O    | 95.3          |
| LYS             | 10     | Side  | NZ   | ASP           | 193    | Side  | OD1  | 97.8          |
| LYS             | 10     | Side  | NZ   | LEU           | 266    | Main  | O    | 94.21         |
| ARG             | 11     | Side  | NH1  | MET           | 1      | Main  | O    | 92.61         |
| ARG             | 11     | Side  | NH2  | MET           | 1      | Main  | O    | 48.05         |
| ARG             | 11     | Side  | NE   | MET           | 1      | Main  | O    | 13.69         |
| ARG             | 11     | Side  | NH1  | GLU           | 2      | Main  | O    | 10.79         |

|     |    |      |     |     |     |      |     |       |
|-----|----|------|-----|-----|-----|------|-----|-------|
| ARG | 11 | Main | N   | TYS | 12  | Side | OS3 | 23.88 |
| SER | 13 | Side | OG  | MET | 1   | Main | N   | 51.95 |
| LEU | 14 | Main | N   | GLU | 2   | Main | O   | 24.88 |
| LEU | 14 | Main | O   | ARG | 183 | Side | NH1 | 41.26 |
| LEU | 14 | Main | O   | ARG | 183 | Side | NH2 | 32.57 |
| GLY | 15 | Main | N   | ASP | 187 | Side | OD1 | 56.64 |
| GLY | 15 | Main | N   | ASP | 187 | Side | OD2 | 42.06 |
| PRO | 16 | Main | N   | ASN | 37  | Side | ND2 | 11.89 |
| GLY | 17 | Main | N   | TYR | 45  | Side | OH  | 11.79 |
| GLY | 17 | Main | N   | ASP | 97  | Side | OD2 | 25.47 |
| ARG | 18 | Side | NH1 | THR | 117 | Side | OG1 | 84.12 |
| ARG | 18 | Side | NH1 | THR | 117 | Side | OG1 | 29.47 |
| ARG | 18 | Side | NH1 | ASP | 171 | Side | OD1 | 69.63 |
| ARG | 18 | Side | NH1 | ASP | 171 | Side | OD2 | 55.04 |
| ARG | 18 | Main | O   | ARG | 188 | Side | NH2 | 99.1  |
| ARG | 18 | Main | O   | ARG | 188 | Side | NE  | 93.61 |
| ARG | 18 | Side | NH2 | HIS | 203 | Side | NE2 | 94.71 |
| ARG | 18 | Side | NH1 | HIS | 203 | Side | NE2 | 88.51 |
| ARG | 18 | Side | NH2 | TYR | 255 | Side | OH  | 71.23 |
| ARG | 18 | Side | NH2 | GLU | 288 | Side | OE2 | 99.4  |
| ARG | 18 | Side | NE  | GLU | 288 | Side | OE1 | 94.51 |
| ARG | 18 | Side | NE  | GLU | 288 | Side | OE2 | 62.34 |
| ARG | 18 | Side | NH2 | GLU | 288 | Side | OE1 | 34.17 |
| TRP | 20 | Side | NE1 | ARG | 188 | Side | NH2 | 53.95 |
| TRP | 20 | Side | NE1 | ARG | 188 | Side | NH1 | 10.69 |
| TRP | 20 | Side | NE1 | TYR | 190 | Side | OH  | 52.85 |
| TRP | 20 | Main | O   | HIS | 281 | Side | ND1 | 21.18 |
| TYR | 21 | Side | OH  | ASN | 278 | Side | ND2 | 52.95 |
| TYR | 21 | Side | OH  | ASN | 278 | Side | ND2 | 33.17 |
| TYR | 21 | Side | OH  | ASN | 278 | Side | OD1 | 21.58 |
| THR | 22 | Side | OG1 | GLU | 277 | Side | OE1 | 27.17 |
| THR | 23 | Side | OG1 | CYS | 28  | Main | O   | 18.08 |
| GLY | 24 | Main | O   | CYS | 28  | Main | N   | 94.61 |
| GLY | 24 | Main | N   | CYS | 28  | Main | O   | 15.58 |
| GLN | 25 | Side | NE2 | CYS | 28  | Main | O   | 11.59 |
| ARG | 31 | Side | NE  | GLU | 14  | Side | OE1 | 71.43 |
| ARG | 31 | Side | NH2 | GLU | 14  | Side | OE1 | 67.33 |
| ARG | 31 | Side | NE  | GLU | 14  | Side | OE2 | 57.84 |
| ARG | 31 | Side | NH2 | GLU | 14  | Side | OE2 | 30.17 |
| ARG | 31 | Side | NH1 | SER | 18  | Side | OG  | 12.69 |
| ARG | 31 | Side | NH1 | ASP | 20  | Side | OD1 | 47.25 |
| LYS | 32 | Side | NZ  | GLY | 17  | Main | O   | 53.55 |
| LYS | 32 | Side | NZ  | SER | 18  | Main | O   | 52.45 |
| LYS | 32 | Side | NZ  | ASP | 20  | Side | OD2 | 84.12 |
| LYS | 32 | Side | NZ  | ASP | 20  | Side | OD1 | 46.65 |
| HIS | 34 | Side | ND1 | ASP | 20  | Side | OD2 | 14.19 |

## Complex 2:

| V3 loop Residue | Number | Group | Atom | CXCR4 Residue | Number | Group | Atom | Occupancy (%) |
|-----------------|--------|-------|------|---------------|--------|-------|------|---------------|
| ARG             | 3      | Side  | NH2  | THR           | 13     | Main  | O    | 20.78         |
| ARG             | 3      | Side  | NH1  | GLU           | 14     | Side  | OE1  | 50.45         |
| ARG             | 3      | Side  | NH2  | GLU           | 14     | Side  | OE1  | 44.66         |
| ARG             | 3      | Side  | NH2  | GLU           | 14     | Side  | OE2  | 41.06         |
| ARG             | 3      | Side  | NH1  | GLU           | 14     | Side  | OE2  | 36.66         |
| ASN             | 5      | Side  | ND2  | ASN           | 11     | Main  | O    | 16.48         |
| ASN             | 5      | Side  | OD1  | ASN           | 11     | Side  | ND2  | 27.7          |
| ASN             | 5      | Side  | ND2  | TYS           | 12     | Main  | O    | 52            |
| ASN             | 6      | Main  | N    | TYS           | 12     | Main  | O    | 21.58         |
| ASN             | 6      | Main  | O    | TYS           | 12     | Main  | N    | 13.79         |
| ASN             | 6      | Side  | ND2  | TYS           | 12     | Main  | O    | 10.99         |
| ASN             | 6      | Side  | ND2  | GLU           | 14     | Side  | OE2  | 16.88         |
| ASN             | 6      | Side  | ND2  | GLU           | 14     | Side  | OE1  | 14.19         |
| THR             | 8      | Main  | O    | THR           | 8      | Side  | OG1  | 19.78         |
| THR             | 8      | Side  | OG1  | SER           | 9      | Main  | N    | 13.29         |
| THR             | 8      | Side  | OG1  | ASP           | 10     | Main  | N    | 29.67         |
| THR             | 8      | Side  | OG1  | ASP           | 10     | Side  | OD1  | 47.25         |
| THR             | 8      | Main  | N    | ASN           | 11     | Side  | OD1  | 12.19         |
| THR             | 8      | Side  | OG1  | ASN           | 11     | Main  | N    | 13.39         |
| ARG             | 9      | Side  | NH2  | ASP           | 22     | Main  | O    | 28.07         |
| ARG             | 9      | Side  | NH2  | SER           | 23     | Main  | O    | 13.39         |
| ARG             | 9      | Side  | NH1  | MET           | 24     | Main  | O    | 17.28         |
| ARG             | 9      | Side  | NH2  | MET           | 24     | Main  | O    | 12.09         |
| ARG             | 9      | Side  | NH2  | LYS           | 25     | Main  | O    | 62.14         |
| ARG             | 9      | Side  | NH1  | LYS           | 25     | Main  | O    | 44.66         |
| ARG             | 9      | Side  | NE   | LYS           | 25     | Main  | O    | 14.59         |
| LYS             | 10     | Side  | NZ   | GLU           | 2      | Side  | OE2  | 27.57         |
| LYS             | 10     | Side  | NZ   | GLU           | 2      | Side  | OE1  | 22.98         |
| LYS             | 10     | Side  | NZ   | ILE           | 6      | Main  | O    | 17.58         |
| ARG             | 11     | Side  | NH1  | TYS           | 21     | Side  | OS3  | 43.46         |
| ARG             | 11     | Side  | NH1  | TYS           | 21     | Side  | OS2  | 42.16         |
| ARG             | 11     | Side  | NH2  | TYS           | 21     | Side  | OS2  | 29.27         |
| ARG             | 11     | Side  | NH2  | TYS           | 21     | Side  | OS3  | 25.37         |
| ARG             | 11     | Side  | NH1  | TYS           | 21     | Side  | OS4  | 14.39         |
| ARG             | 11     | Side  | NH2  | TYS           | 21     | Side  | OS4  | 9.89          |
| ARG             | 11     | Side  | NH1  | GLU           | 277    | Side  | OE1  | 81.72         |
| ARG             | 11     | Side  | NH1  | GLU           | 277    | Side  | OE2  | 62.54         |
| ARG             | 11     | Side  | NE   | GLU           | 277    | Side  | OE1  | 14.29         |
| VAL             | 12     | Main  | N    | CYS           | 28     | Main  | O    | 80.32         |
| LEU             | 14     | Main  | N    | GLU           | 277    | Side  | OE2  | 40.66         |
| LEU             | 14     | Main  | N    | GLU           | 277    | Side  | OE1  | 22.28         |
| GLY             | 15     | Main  | O    | HIS           | 281    | Side  | ND1  | 84.12         |
| GLY             | 17     | Main  | O    | ASN           | 37     | Side  | ND2  | 66.13         |
| GLY             | 17     | Main  | O    | ARG           | 183    | Side  | NH2  | 46.35         |
| GLY             | 17     | Main  | N    | SER           | 285    | Side  | OG   | 75.02         |

|     |    |      |     |     |     |      |     |       |
|-----|----|------|-----|-----|-----|------|-----|-------|
| GLY | 17 | Main | N   | GLU | 288 | Side | OE2 | 19.37 |
| ARG | 18 | Side | NE  | TYR | 45  | Side | OH  | 12.29 |
| ARG | 18 | Side | NH1 | TRP | 94  | Side | NE1 | 24.68 |
| ARG | 18 | Side | NH2 | TYR | 116 | Side | OH  | 95    |
| ARG | 18 | Main | O   | ARG | 183 | Side | NH1 | 72.83 |
| ARG | 18 | Main | O   | ARG | 183 | Side | NH2 | 26.37 |
| ARG | 18 | Side | NH2 | TYR | 255 | Side | OH  | 55.14 |
| ARG | 18 | Side | NH2 | TYR | 255 | Side | OH  | 54.25 |
| ARG | 18 | Side | NE  | GLU | 288 | Side | OE1 | 99.7  |
| ARG | 18 | Side | NH2 | GLU | 288 | Side | OE2 | 99.5  |
| ARG | 18 | Side | NE  | GLU | 288 | Side | OE2 | 74.13 |
| ARG | 18 | Side | NH2 | GLU | 288 | Side | OE1 | 30.17 |
| TRP | 20 | Side | NE1 | ARG | 183 | Side | NH2 | 37.16 |
| TRP | 20 | Main | N   | ASP | 187 | Side | OD1 | 10.39 |
| TRP | 20 | Side | NE1 | HIS | 281 | Side | NE2 | 14.59 |
| TYR | 21 | Side | OH  | ARG | 188 | Side | NH2 | 45.05 |
| TYR | 21 | Side | OH  | TYR | 190 | Side | OH  | 10.79 |
| TYR | 21 | Side | OH  | GLN | 200 | Side | OE1 | 89.41 |
| THR | 22 | Side | OG1 | SER | 178 | Side | OG  | 70.53 |
| THR | 22 | Main | N   | ASP | 187 | Side | OD2 | 47.15 |
| THR | 22 | Main | N   | ASP | 187 | Side | OD1 | 29.27 |
| THR | 22 | Side | OG1 | ASP | 187 | Side | OD1 | 45.75 |
| THR | 22 | Side | OG1 | ASP | 187 | Side | OD2 | 44.36 |
| THR | 23 | Side | OG1 | ARG | 188 | Main | O   | 32.67 |
| THR | 23 | Side | OG1 | TYR | 190 | Main | N   | 69.43 |
| GLN | 25 | Side | NE2 | LYS | 25  | Main | O   | 16.08 |
| GLN | 25 | Side | NE2 | ASP | 193 | Side | OD1 | 10.29 |
| ILE | 26 | Main | N   | ASP | 193 | Side | OD2 | 26.07 |
| ILE | 26 | Main | N   | ASP | 193 | Side | OD1 | 18.68 |
| GLY | 28 | Main | N   | ASP | 22  | Main | O   | 52.05 |
| GLY | 28 | Main | N   | SER | 23  | Main | O   | 30.07 |
| GLY | 28 | Main | N   | SER | 23  | Side | OG  | 18.28 |
| ASP | 29 | Main | N   | SER | 23  | Main | O   | 33.97 |
| ASP | 29 | Main | N   | SER | 23  | Side | OG  | 15.58 |
| ARG | 31 | Side | NH2 | SER | 23  | Main | O   | 20.78 |
| LYS | 32 | Side | NZ  | GLU | 14  | Side | OE1 | 10.69 |

## Complex 3:

| V3 loop Residue | Number | Group | Atom | CXCR4 Residue | Number | Group | Atom | Occupancy (%) |
|-----------------|--------|-------|------|---------------|--------|-------|------|---------------|
| ARG             | 3.00   | Side  | NH1  | ASP           | 22.00  | Main  | O    | 43.36         |
| ARG             | 3.00   | Side  | NH2  | ASP           | 22.00  | Side  | OD2  | 99.30         |
| ARG             | 3.00   | Side  | NH1  | ASP           | 22.00  | Side  | OD1  | 95.70         |
| ARG             | 3.00   | Side  | NH2  | ASP           | 22.00  | Side  | OD1  | 77.42         |
| ARG             | 3.00   | Side  | NH1  | ASP           | 22.00  | Side  | OD2  | 22.78         |
| ARG             | 3.00   | Side  | NH1  | GLU           | 268.00 | Side  | OE1  | 81.62         |
| ARG             | 3.00   | Side  | NE   | GLU           | 268.00 | Side  | OE1  | 80.62         |
| ARG             | 3.00   | Side  | NH1  | GLU           | 268.00 | Side  | OE2  | 80.32         |
| ARG             | 3.00   | Side  | NE   | GLU           | 268.00 | Side  | OE2  | 14.39         |
| ASN             | 6.00   | Main  | N    | ASP           | 22.00  | Side  | OD2  | 90.21         |
| ASN             | 6.00   | Side  | ND2  | ASP           | 22.00  | Side  | OD1  | 14.29         |
| ASN             | 7.00   | Side  | ND2  | ASP           | 20.00  | Side  | OD2  | 19.28         |
| ASN             | 7.00   | Side  | ND2  | ASP           | 20.00  | Side  | OD1  | 15.68         |
| THR             | 8.00   | Main  | N    | ASP           | 20.00  | Main  | O    | 11.69         |
| THR             | 8.00   | Main  | N    | ASP           | 20.00  | Side  | OD1  | 41.96         |
| THR             | 8.00   | Main  | N    | ASP           | 20.00  | Side  | OD2  | 37.06         |
| THR             | 8.00   | Side  | OG1  | TYS           | 21.00  | Main  | O    | 58.94         |
| THR             | 8.00   | Side  | OG1  | TYS           | 21.00  | Main  | N    | 46.55         |
| THR             | 8.00   | Side  | OG1  | TYS           | 21.00  | Main  | N    | 18.58         |
| ARG             | 9.00   | Side  | NH1  | TYS           | 7.00   | Main  | O    | 13.09         |
| ARG             | 9.00   | Side  | NH1  | THR           | 8.00   | Main  | O    | 21.68         |
| ARG             | 9.00   | Side  | NH2  | ASP           | 10.00  | Side  | OD2  | 73.73         |
| ARG             | 9.00   | Side  | NH2  | ASP           | 10.00  | Side  | OD1  | 68.23         |
| ARG             | 9.00   | Side  | NE   | ASP           | 10.00  | Side  | OD1  | 64.54         |
| ARG             | 9.00   | Side  | NE   | ASP           | 10.00  | Side  | OD2  | 49.05         |
| LYS             | 10.00  | Side  | NZ   | GLY           | 19.00  | Main  | O    | 48.95         |
| LYS             | 10.00  | Side  | NZ   | TYS           | 21.00  | Main  | O    | 20.98         |
| LYS             | 10.00  | Side  | NZ   | TYR           | 190.00 | Main  | O    | 41.86         |
| LYS             | 10.00  | Side  | NZ   | ASN           | 192.00 | Side  | OD1  | 16.58         |
| LYS             | 10.00  | Side  | NZ   | ASP           | 193.00 | Side  | OD2  | 32.37         |
| LYS             | 10.00  | Side  | NZ   | ASP           | 193.00 | Side  | OD1  | 25.77         |
| ARG             | 11.00  | Side  | NH1  | GLU           | 2.00   | Main  | O    | 95.20         |
| ARG             | 11.00  | Side  | NE   | GLU           | 2.00   | Main  | O    | 84.72         |
| ARG             | 11.00  | Side  | NH1  | TYS           | 7.00   | Side  | OS2  | 54.05         |
| ARG             | 11.00  | Side  | NH1  | TYS           | 7.00   | Side  | OS4  | 43.76         |
| ARG             | 11.00  | Side  | NH2  | TYS           | 7.00   | Side  | OS2  | 38.06         |
| ARG             | 11.00  | Side  | NH2  | TYS           | 7.00   | Side  | OS4  | 12.99         |
| ARG             | 11.00  | Side  | NH2  | TYR           | 190.00 | Main  | O    | 32.37         |
| ARG             | 11.00  | Side  | NH1  | TYR           | 190.00 | Main  | O    | 26.37         |
| SER             | 13.00  | Side  | OG   | ASN           | 33.00  | Side  | ND2  | 27.27         |
| SER             | 13.00  | Side  | OG   | ASN           | 33.00  | Side  | OD1  | 10.09         |
| SER             | 13.00  | Side  | OG   | ASP           | 181.00 | Side  | OD2  | 11.19         |
| SER             | 13.00  | Side  | OG   | ARG           | 183.00 | Side  | NH1  | 11.29         |
| LEU             | 14.00  | Main  | O    | ARG           | 183.00 | Side  | NH1  | 78.62         |
| LEU             | 14.00  | Main  | O    | ARG           | 183.00 | Side  | NE   | 31.17         |

|     |       |      |     |     |        |      |     |       |
|-----|-------|------|-----|-----|--------|------|-----|-------|
| GLY | 15.00 | Main | N   | ASP | 187.00 | Side | OD2 | 15.68 |
| PRO | 16.00 | Main | O   | SER | 285.00 | Side | OG  | 12.19 |
| ARG | 18.00 | Side | NH1 | HIS | 113.00 | Side | NE2 | 35.56 |
| ARG | 18.00 | Side | NH1 | TYR | 116.00 | Main | O   | 30.87 |
| ARG | 18.00 | Side | NH2 | TYR | 116.00 | Main | O   | 17.08 |
| ARG | 18.00 | Side | NH1 | THR | 117.00 | Side | OG1 | 76.92 |
| ARG | 18.00 | Side | NH1 | THR | 117.00 | Side | OG1 | 18.78 |
| ARG | 18.00 | Side | NH1 | ASP | 171.00 | Side | OD2 | 57.34 |
| ARG | 18.00 | Side | NH1 | ASP | 171.00 | Side | OD1 | 19.98 |
| ARG | 18.00 | Main | O   | ARG | 188.00 | Side | NH2 | 58.64 |
| ARG | 18.00 | Main | O   | ARG | 188.00 | Side | NE  | 42.36 |
| ARG | 18.00 | Side | NH1 | ARG | 188.00 | Side | NH1 | 18.88 |
| ARG | 18.00 | Side | NH1 | ARG | 188.00 | Side | NH1 | 10.79 |
| ARG | 18.00 | Side | NH2 | HIS | 203.00 | Side | NE2 | 52.75 |
| ARG | 18.00 | Side | NH1 | HIS | 203.00 | Side | NE2 | 16.18 |
| ARG | 18.00 | Side | NH2 | TYR | 255.00 | Side | OH  | 42.46 |
| ARG | 18.00 | Side | NH2 | TYR | 255.00 | Side | OH  | 23.68 |
| ARG | 18.00 | Side | NE  | TYR | 255.00 | Side | OH  | 20.48 |
| ARG | 18.00 | Side | NE  | TYR | 255.00 | Side | OH  | 19.08 |
| ARG | 18.00 | Main | N   | GLU | 288.00 | Side | OE2 | 67.73 |
| ARG | 18.00 | Main | N   | GLU | 288.00 | Side | OE1 | 26.07 |
| ARG | 18.00 | Side | NE  | GLU | 288.00 | Side | OE1 | 73.03 |
| ARG | 18.00 | Side | NH2 | GLU | 288.00 | Side | OE1 | 71.93 |
| ARG | 18.00 | Side | NE  | GLU | 288.00 | Side | OE2 | 44.56 |
| ARG | 18.00 | Side | NH2 | GLU | 288.00 | Side | OE2 | 28.37 |
| TRP | 20.00 | Main | O   | LYS | 25.00  | Side | NZ  | 34.67 |
| TRP | 20.00 | Side | NE1 | ASP | 187.00 | Side | OD1 | 11.49 |
| TRP | 20.00 | Side | NE1 | ARG | 188.00 | Main | O   | 59.54 |
| TYR | 21.00 | Side | OH  | CYS | 28.00  | Main | N   | 10.99 |
| TYR | 21.00 | Side | OH  | ASN | 33.00  | Side | ND2 | 20.08 |
| TYR | 21.00 | Side | OH  | SER | 285.00 | Side | OG  | 30.37 |
| THR | 22.00 | Main | O   | LYS | 25.00  | Main | N   | 10.39 |
| THR | 23.00 | Side | OG1 | CYS | 28.00  | Main | N   | 35.36 |
| THR | 23.00 | Side | OG1 | CYS | 28.00  | Main | O   | 17.08 |
| GLY | 24.00 | Main | N   | LYS | 25.00  | Main | O   | 24.38 |
| GLY | 24.00 | Main | N   | GLU | 26.00  | Main | O   | 56.44 |
| ARG | 31.00 | Side | NH2 | ASP | 20.00  | Main | O   | 84.32 |
| ARG | 31.00 | Side | NE  | ASP | 20.00  | Main | O   | 72.93 |
| ARG | 31.00 | Side | NH2 | TYS | 21.00  | Side | OS4 | 33.07 |
| ARG | 31.00 | Side | NH2 | TYS | 21.00  | Side | OS2 | 32.37 |
| ARG | 31.00 | Side | NH1 | TYS | 21.00  | Side | OS2 | 32.07 |
| ARG | 31.00 | Side | NH1 | TYS | 21.00  | Side | OS4 | 31.97 |
| ARG | 31.00 | Side | NH1 | TYS | 21.00  | Side | OS3 | 31.77 |
| ARG | 31.00 | Side | NH2 | TYS | 21.00  | Side | OS3 | 31.07 |
| LYS | 32.00 | Side | NZ  | TYS | 21.00  | Side | OS2 | 36.36 |
| LYS | 32.00 | Side | NZ  | TYS | 21.00  | Side | OS4 | 36.26 |
| LYS | 32.00 | Side | NZ  | TYS | 21.00  | Side | OS3 | 35.76 |



## Complex 4:

| V3 loop Residue | Number | Group | Atom | CXCR4 Residue | Number | Group | Atom | Occupancy (%) |
|-----------------|--------|-------|------|---------------|--------|-------|------|---------------|
| ARG             | 3.00   | Side  | NH1  | ASP           | 22.00  | Main  | O    | 36.16         |
| ARG             | 3.00   | Side  | NH1  | ASP           | 22.00  | Side  | OD2  | 10.49         |
| ASN             | 5.00   | Side  | ND2  | SER           | 23.00  | Main  | O    | 19.98         |
| ASN             | 6.00   | Main  | N    | SER           | 23.00  | Main  | O    | 35.76         |
| ASN             | 7.00   | Side  | ND2  | GLU           | 14.00  | Side  | OE2  | 29.77         |
| ASN             | 7.00   | Side  | ND2  | GLU           | 14.00  | Side  | OE1  | 17.18         |
| THR             | 8.00   | Side  | OG1  | LYS           | 25.00  | Main  | N    | 46.95         |
| ARG             | 9.00   | Side  | NH1  | ASP           | 10.00  | Main  | O    | 77.42         |
| ARG             | 9.00   | Side  | NH1  | ASN           | 11.00  | Side  | OD1  | 74.23         |
| ARG             | 9.00   | Side  | NH2  | ASN           | 11.00  | Side  | OD1  | 10.69         |
| ARG             | 9.00   | Side  | NE   | GLU           | 14.00  | Side  | OE2  | 50.15         |
| ARG             | 9.00   | Side  | NH2  | GLU           | 14.00  | Side  | OE2  | 49.45         |
| ARG             | 9.00   | Side  | NE   | GLU           | 14.00  | Side  | OE1  | 49.35         |
| ARG             | 9.00   | Side  | NH2  | GLU           | 14.00  | Side  | OE1  | 47.45         |
| LYS             | 10.00  | Main  | N    | TYS           | 12.00  | Side  | OS4  | 60.94         |
| LYS             | 10.00  | Main  | N    | TYS           | 12.00  | Side  | OS2  | 28.17         |
| LYS             | 10.00  | Side  | NZ   | GLY           | 19.00  | Main  | O    | 96.90         |
| LYS             | 10.00  | Side  | NZ   | ASP           | 20.00  | Main  | O    | 72.43         |
| LYS             | 10.00  | Side  | NZ   | ASP           | 193.00 | Side  | OD1  | 99.80         |
| LYS             | 10.00  | Side  | NZ   | GLU           | 268.00 | Side  | OE2  | 75.12         |
| ARG             | 11.00  | Side  | NE   | ASP           | 10.00  | Side  | OD2  | 95.10         |
| ARG             | 11.00  | Side  | NH1  | ASP           | 10.00  | Side  | OD2  | 91.51         |
| ARG             | 11.00  | Side  | NH1  | ASP           | 10.00  | Side  | OD1  | 10.19         |
| ARG             | 11.00  | Side  | NH2  | PRO           | 191.00 | Main  | O    | 89.71         |
| SER             | 13.00  | Side  | OG   | MET           | 1.00   | Main  | N    | 98.60         |
| SER             | 13.00  | Main  | O    | ARG           | 30.00  | Side  | NH1  | 18.08         |
| LEU             | 14.00  | Main  | N    | GLU           | 2.00   | Main  | O    | 75.12         |
| LEU             | 14.00  | Main  | O    | ARG           | 30.00  | Side  | NH1  | 36.56         |
| LEU             | 14.00  | Main  | O    | ARG           | 30.00  | Side  | NH2  | 19.28         |
| GLY             | 15.00  | Main  | N    | ASP           | 187.00 | Side  | OD2  | 53.75         |
| GLY             | 15.00  | Main  | N    | ASP           | 187.00 | Side  | OD1  | 44.96         |
| ARG             | 18.00  | Side  | NH2  | TYR           | 45.00  | Side  | OH   | 70.63         |
| ARG             | 18.00  | Side  | NH1  | TYR           | 45.00  | Side  | OH   | 16.88         |
| ARG             | 18.00  | Side  | NH1  | TRP           | 94.00  | Side  | NE1  | 76.12         |
| ARG             | 18.00  | Main  | O    | ARG           | 188.00 | Side  | NH2  | 94.31         |
| ARG             | 18.00  | Main  | O    | ARG           | 188.00 | Side  | NE   | 43.36         |
| ARG             | 18.00  | Side  | NH2  | TYR           | 255.00 | Side  | OH   | 10.39         |
| ARG             | 18.00  | Side  | NH2  | TYR           | 255.00 | Side  | OH   | 10.29         |
| ARG             | 18.00  | Main  | N    | GLU           | 288.00 | Side  | OE2  | 95.80         |
| ARG             | 18.00  | Side  | NH2  | GLU           | 288.00 | Side  | OE1  | 98.90         |
| ARG             | 18.00  | Side  | NE   | GLU           | 288.00 | Side  | OE1  | 80.32         |
| ARG             | 18.00  | Side  | NE   | GLU           | 288.00 | Side  | OE2  | 74.23         |
| ARG             | 18.00  | Side  | NH2  | GLU           | 288.00 | Side  | OE2  | 21.58         |
| VAL             | 19.00  | Main  | N    | GLU           | 288.00 | Side  | OE2  | 23.98         |
| TRP             | 20.00  | Side  | NE1  | ARG           | 188.00 | Side  | NE   | 15.78         |

|     |       |      |     |     |        |      |     |       |
|-----|-------|------|-----|-----|--------|------|-----|-------|
| TRP | 20.00 | Side | NE1 | TYR | 190.00 | Side | OH  | 21.38 |
| TYR | 21.00 | Side | OH  | PHE | 29.00  | Main | O   | 20.78 |
| TYR | 21.00 | Side | OH  | ASN | 278.00 | Side | ND2 | 30.77 |
| TYR | 21.00 | Side | OH  | ASN | 278.00 | Side | ND2 | 27.57 |
| THR | 23.00 | Side | OG1 | MET | 1.00   | Main | N   | 54.95 |
| GLY | 24.00 | Main | O   | CYS | 28.00  | Main | N   | 30.67 |
| GLN | 25.00 | Side | NE2 | THR | 8.00   | Side | OG1 | 9.99  |
| GLN | 25.00 | Side | OE1 | SER | 9.00   | Main | N   | 73.83 |
| GLN | 25.00 | Side | NE2 | SER | 9.00   | Side | OG  | 20.98 |
| ILE | 26.00 | Main | N   | LYS | 25.00  | Main | O   | 54.75 |
| ARG | 31.00 | Side | NH1 | ASP | 20.00  | Side | OD1 | 50.55 |
| ARG | 31.00 | Side | NH1 | ASP | 20.00  | Side | OD2 | 38.56 |
| ARG | 31.00 | Side | NH1 | TYS | 21.00  | Main | O   | 81.72 |
| ARG | 31.00 | Side | NH2 | TYS | 21.00  | Main | O   | 70.63 |
| ARG | 31.00 | Side | NH2 | ASP | 22.00  | Main | O   | 10.59 |
| ARG | 31.00 | Side | NH2 | SER | 23.00  | Main | O   | 91.41 |
| ARG | 31.00 | Side | NH1 | SER | 23.00  | Main | O   | 12.29 |
| LYS | 32.00 | Side | NZ  | ASP | 20.00  | Side | OD1 | 45.85 |
| LYS | 32.00 | Side | NZ  | ASP | 20.00  | Side | OD2 | 44.76 |

## Complex 5:

| V3 loop Residue | Number | Group | Atom | CXCR4 Residue | Number | Group | Atom | Occupancy (%) |
|-----------------|--------|-------|------|---------------|--------|-------|------|---------------|
| CYS             | 1      | Main  | N    | MET           | 24     | Main  | O    | 33.57         |
| CYS             | 1      | Main  | N    | GLU           | 26     | Side  | OE1  | 71.83         |
| CYS             | 1      | Main  | N    | GLU           | 26     | Side  | OE2  | 69.53         |
| ASN             | 7      | Side  | ND2  | SER           | 23     | Main  | O    | 10.49         |
| ARG             | 9      | Side  | NH1  | ASP           | 20     | Side  | OD2  | 75.22         |
| ARG             | 9      | Side  | NH1  | ASP           | 20     | Side  | OD1  | 62.84         |
| ARG             | 9      | Side  | NH2  | ASP           | 20     | Side  | OD2  | 52.05         |
| ARG             | 9      | Side  | NH2  | ASP           | 20     | Side  | OD1  | 31.97         |
| ARG             | 9      | Side  | NH1  | TYS           | 21     | Main  | O    | 31.67         |
| ARG             | 9      | Side  | NH1  | ASP           | 22     | Main  | O    | 24.08         |
| ARG             | 9      | Side  | NH2  | ASP           | 193    | Side  | OD2  | 49.95         |
| ARG             | 9      | Side  | NH2  | ASP           | 193    | Side  | OD1  | 46.95         |
| ARG             | 9      | Side  | NH1  | ASP           | 193    | Side  | OD1  | 16.08         |
| ARG             | 9      | Side  | NH1  | ASP           | 193    | Side  | OD2  | 11.79         |
| LYS             | 10     | Side  | NZ   | CYS           | 28     | Main  | O    | 75.82         |
| LYS             | 10     | Side  | NZ   | PHE           | 29     | Main  | O    | 11.69         |
| LYS             | 10     | Side  | NZ   | GLU           | 277    | Side  | OE2  | 39.06         |
| LYS             | 10     | Side  | NZ   | GLU           | 277    | Side  | OE1  | 26.37         |
| ARG             | 11     | Side  | NH2  | ASP           | 10     | Side  | OD2  | 86.11         |
| ARG             | 11     | Side  | NH1  | ASP           | 10     | Side  | OD1  | 81.52         |
| ARG             | 11     | Side  | NH1  | ASP           | 10     | Side  | OD2  | 69.83         |
| ARG             | 11     | Side  | NH2  | ASP           | 10     | Side  | OD1  | 23.08         |
| ARG             | 11     | Side  | NH2  | PRO           | 191    | Main  | O    | 85.01         |
| ARG             | 11     | Side  | NE   | ASP           | 193    | Side  | OD2  | 12.79         |
| ARG             | 11     | Side  | NH1  | ASP           | 193    | Side  | OD1  | 9.69          |
| SER             | 13     | Side  | OG   | ARG           | 188    | Main  | O    | 97.10         |
| SER             | 13     | Side  | OG   | TYR           | 190    | Main  | N    | 61.84         |
| LEU             | 14     | Main  | O    | ARG           | 188    | Side  | NH2  | 99.90         |
| LEU             | 14     | Main  | O    | ARG           | 188    | Side  | NE   | 68.13         |
| LEU             | 14     | Main  | N    | GLN           | 200    | Side  | OE1  | 23.98         |
| GLY             | 17     | Main  | O    | SER           | 285    | Side  | OG   | 99.10         |
| GLY             | 17     | Main  | N    | GLU           | 288    | Side  | OE2  | 92.91         |
| GLY             | 17     | Main  | N    | GLU           | 288    | Side  | OE1  | 87.01         |
| ARG             | 18     | Side  | NH1  | ASP           | 181    | Side  | OD2  | 16.48         |
| ARG             | 18     | Side  | NH2  | ASP           | 181    | Side  | OD2  | 16.28         |
| ARG             | 18     | Side  | NE   | HIS           | 281    | Side  | NE2  | 42.56         |
| ARG             | 18     | Side  | NH2  | HIS           | 281    | Side  | NE2  | 20.58         |
| VAL             | 19     | Main  | O    | HIS           | 281    | Side  | ND1  | 11.29         |
| TYR             | 21     | Main  | O    | MET           | 1      | Main  | N    | 76.32         |
| TYR             | 21     | Side  | OH   | GLU           | 277    | Main  | O    | 57.74         |
| TYR             | 21     | Side  | OH   | ASN           | 278    | Side  | ND2  | 22.58         |
| TYR             | 21     | Side  | OH   | HIS           | 281    | Side  | ND1  | 12.39         |
| THR             | 22     | Side  | OG1  | MET           | 1      | Main  | N    | 77.42         |
| THR             | 22     | Side  | OG1  | ILE           | 6      | Main  | O    | 17.18         |
| GLN             | 25     | Main  | N    | THR           | 8      | Side  | OG1  | 20.48         |

|     |    |      |     |     |    |      |     |       |
|-----|----|------|-----|-----|----|------|-----|-------|
| GLN | 25 | Side | NE2 | THR | 8  | Side | OG1 | 29.67 |
| GLN | 25 | Side | NE2 | SER | 9  | Side | OG  | 23.58 |
| VAL | 27 | Main | N   | TYS | 12 | Main | O   | 91.91 |
| ILE | 30 | Main | O   | SER | 23 | Side | OG  | 65.23 |
| LYS | 32 | Side | NZ  | ASP | 22 | Side | OD1 | 45.05 |
| LYS | 32 | Side | NZ  | ASP | 22 | Side | OD2 | 42.16 |
| LYS | 32 | Main | N   | SER | 23 | Side | OG  | 22.58 |
| LYS | 32 | Main | N   | SER | 23 | Side | OG  | 10.09 |
| LYS | 32 | Side | NZ  | SER | 23 | Side | OG  | 19.08 |

## Complex 6:

| V3 loop Residue | Number | Group | Atom | CXCR4 Residue | Number | Group | Atom | Occupancy (%) |
|-----------------|--------|-------|------|---------------|--------|-------|------|---------------|
| CYS             | 1      | Main  | N    | SER           | 23     | Main  | O    | 27.27         |
| CYS             | 1      | Main  | N    | SER           | 23     | Side  | OG   | 70.23         |
| CYS             | 1      | Main  | O    | SER           | 23     | Side  | OG   | 16.08         |
| ASN             | 5      | Side  | ND2  | SER           | 18     | Side  | OG   | 23.18         |
| ASN             | 5      | Side  | ND2  | ASP           | 20     | Side  | OD1  | 68.83         |
| ASN             | 6      | Main  | N    | ASP           | 20     | Side  | OD1  | 85.71         |
| ASN             | 6      | Main  | N    | ASP           | 20     | Side  | OD2  | 25.37         |
| ASN             | 6      | Side  | ND2  | ASP           | 20     | Side  | OD1  | 14.89         |
| ASN             | 6      | Side  | ND2  | TYS           | 21     | Main  | O    | 28.47         |
| ASN             | 7      | Side  | ND2  | TYS           | 12     | Main  | O    | 97.50         |
| ASN             | 7      | Side  | ND2  | GLU           | 14     | Side  | OE1  | 64.14         |
| ASN             | 7      | Side  | ND2  | GLU           | 14     | Side  | OE2  | 33.77         |
| THR             | 8      | Side  | OG1  | ASN           | 11     | Main  | N    | 35.26         |
| THR             | 8      | Side  | OG1  | ASN           | 11     | Side  | OD1  | 44.56         |
| ARG             | 9      | Main  | O    | SER           | 9      | Main  | N    | 39.26         |
| ARG             | 9      | Side  | NH2  | TYS           | 12     | Side  | OS2  | 93.11         |
| ARG             | 9      | Side  | NH2  | TYS           | 12     | Side  | OH   | 33.97         |
| ARG             | 9      | Side  | NH2  | TYS           | 12     | Side  | OS3  | 33.67         |
| ARG             | 9      | Side  | NH1  | TYS           | 12     | Side  | OS3  | 20.68         |
| ARG             | 9      | Side  | NH1  | TYS           | 12     | Side  | OS2  | 12.39         |
| ARG             | 9      | Side  | NH2  | GLY           | 19     | Main  | O    | 10.29         |
| ARG             | 9      | Side  | NH1  | ASP           | 20     | Side  | OD2  | 87.31         |
| ARG             | 9      | Side  | NH2  | ASP           | 20     | Side  | OD2  | 14.69         |
| ARG             | 9      | Side  | NH2  | ASP           | 193    | Side  | OD1  | 98.50         |
| ARG             | 9      | Side  | NE   | ASP           | 193    | Side  | OD2  | 97.00         |
| ARG             | 9      | Side  | NH2  | ASP           | 193    | Side  | OD2  | 73.43         |
| ARG             | 9      | Side  | NE   | ASP           | 193    | Side  | OD1  | 41.16         |
| ARG             | 11     | Main  | N    | TYS           | 7      | Main  | O    | 56.74         |
| ARG             | 11     | Side  | NH1  | ASP           | 10     | Side  | OD2  | 88.61         |
| ARG             | 11     | Side  | NH1  | ASP           | 10     | Side  | OD1  | 36.96         |
| ARG             | 11     | Side  | NH2  | ASP           | 10     | Side  | OD1  | 30.07         |
| ARG             | 11     | Side  | NH2  | TYR           | 190    | Main  | O    | 63.54         |
| ARG             | 11     | Side  | NH1  | TYR           | 190    | Main  | O    | 14.89         |
| ARG             | 11     | Side  | NH2  | PRO           | 191    | Main  | O    | 18.38         |
| ARG             | 11     | Side  | NH1  | PRO           | 191    | Main  | O    | 16.38         |
| SER             | 13     | Side  | OG   | MET           | 1      | Main  | N    | 14.09         |
| SER             | 13     | Side  | OG   | ASP           | 181    | Main  | N    | 14.79         |
| SER             | 13     | Side  | OG   | ASP           | 181    | Side  | OD1  | 30.47         |
| SER             | 13     | Side  | OG   | ASP           | 181    | Side  | OD2  | 19.88         |
| SER             | 13     | Side  | OG   | ARG           | 183    | Side  | NH2  | 20.58         |
| GLY             | 15     | Main  | O    | ASN           | 37     | Side  | ND2  | 27.17         |
| PRO             | 16     | Main  | O    | ASN           | 37     | Side  | ND2  | 15.48         |
| PRO             | 16     | Main  | O    | ARG           | 183    | Side  | NH1  | 39.76         |
| GLY             | 17     | Main  | N    | TYR           | 45     | Side  | OH   | 67.33         |
| GLY             | 17     | Main  | N    | GLU           | 288    | Side  | OE1  | 12.49         |

|     |    |      |     |     |     |      |     |       |
|-----|----|------|-----|-----|-----|------|-----|-------|
| ARG | 18 | Side | NH2 | TRP | 94  | Side | NE1 | 74.53 |
| ARG | 18 | Side | NH1 | HIS | 113 | Side | NE2 | 93.01 |
| ARG | 18 | Side | NE  | TYR | 116 | Side | OH  | 21.98 |
| ARG | 18 | Side | NE  | TYR | 116 | Side | OH  | 18.58 |
| ARG | 18 | Side | NH2 | GLU | 288 | Side | OE1 | 99.90 |
| ARG | 18 | Side | NE  | GLU | 288 | Side | OE2 | 99.80 |
| ARG | 18 | Side | NE  | GLU | 288 | Side | OE1 | 61.84 |
| ARG | 18 | Side | NH2 | GLU | 288 | Side | OE2 | 52.75 |
| VAL | 19 | Main | N   | ASP | 187 | Side | OD2 | 14.79 |
| VAL | 19 | Main | O   | TYR | 190 | Side | OH  | 30.97 |
| TRP | 20 | Side | NE1 | ARG | 188 | Side | NH1 | 18.98 |
| TRP | 20 | Side | NE1 | ARG | 188 | Side | NH1 | 16.68 |
| TRP | 20 | Side | NE1 | TYR | 190 | Side | OH  | 9.39  |
| TYR | 21 | Side | OH  | TYS | 7   | Side | OH  | 11.29 |
| TYR | 21 | Side | OH  | ASP | 187 | Side | OD1 | 96.60 |
| TYR | 21 | Side | OH  | ASP | 187 | Side | OD2 | 9.69  |
| THR | 22 | Side | OG1 | GLU | 277 | Side | OE2 | 93.41 |
| THR | 22 | Side | OG1 | GLU | 277 | Side | OE1 | 29.97 |
| THR | 23 | Main | O   | LYS | 25  | Side | NZ  | 90.71 |
| THR | 23 | Side | OG1 | LYS | 25  | Side | NZ  | 68.23 |
| ARG | 31 | Side | NH1 | GLU | 14  | Side | OE1 | 94.41 |
| ARG | 31 | Side | NH1 | GLU | 14  | Side | OE2 | 92.11 |
| ARG | 31 | Side | NH2 | GLU | 14  | Side | OE1 | 70.93 |
| ARG | 31 | Side | NH2 | GLU | 14  | Side | OE2 | 45.95 |

## Complex 7:

| V3 loop Residue | Number | Group | Atom | CXCR4 Residue | Number | Group | Atom | Occupancy (%) |
|-----------------|--------|-------|------|---------------|--------|-------|------|---------------|
| ARG             | 3      | Side  | NH2  | GLY           | 19     | Main  | O    | 15.08         |
| ARG             | 3      | Side  | NH1  | ASP           | 22     | Side  | OD1  | 30.57         |
| ARG             | 3      | Side  | NH1  | ASP           | 22     | Side  | OD2  | 24.78         |
| ARG             | 3      | Side  | NE   | ASP           | 22     | Side  | OD1  | 17.28         |
| ARG             | 3      | Side  | NE   | ASP           | 22     | Side  | OD2  | 16.58         |
| ARG             | 3      | Side  | NH2  | GLU           | 268    | Side  | OE1  | 52.95         |
| ARG             | 3      | Side  | NH1  | GLU           | 268    | Side  | OE2  | 48.45         |
| ARG             | 3      | Side  | NH2  | GLU           | 268    | Side  | OE2  | 44.26         |
| ARG             | 3      | Side  | NH1  | GLU           | 268    | Side  | OE1  | 18.38         |
| ASN             | 7      | Side  | OD1  | THR           | 13     | Side  | OG1  | 44.96         |
| ASN             | 7      | Side  | ND2  | THR           | 13     | Side  | OG1  | 12.99         |
| THR             | 8      | Main  | N    | THR           | 13     | Side  | OG1  | 21.78         |
| THR             | 8      | Main  | O    | THR           | 13     | Side  | OG1  | 14.39         |
| THR             | 8      | Main  | O    | GLU           | 14     | Main  | N    | 73.63         |
| THR             | 8      | Side  | OG1  | GLU           | 14     | Side  | OE2  | 38.46         |
| ARG             | 9      | Side  | NH2  | ASN           | 11     | Side  | OD1  | 17.88         |
| ARG             | 9      | Side  | NE   | TYS           | 12     | Main  | O    | 95.80         |
| ARG             | 9      | Side  | NH2  | TYS           | 12     | Main  | O    | 62.84         |
| LYS             | 10     | Side  | NZ   | GLU           | 14     | Side  | OE1  | 89.11         |
| LYS             | 10     | Side  | NZ   | GLU           | 14     | Side  | OE2  | 39.36         |
| LYS             | 10     | Side  | NZ   | SER           | 23     | Main  | O    | 28.27         |
| LYS             | 10     | Side  | NZ   | SER           | 23     | Side  | OG   | 10.29         |
| LYS             | 10     | Side  | NZ   | ASP           | 193    | Side  | OD1  | 63.04         |
| LYS             | 10     | Side  | NZ   | ASP           | 193    | Side  | OD2  | 44.56         |
| ARG             | 11     | Side  | NH2  | GLU           | 2      | Side  | OE2  | 35.66         |
| ARG             | 11     | Side  | NH2  | GLU           | 2      | Side  | OE1  | 12.89         |
| ARG             | 11     | Side  | NH1  | THR           | 8      | Side  | OG1  | 10.29         |
| VAL             | 12     | Main  | N    | GLU           | 2      | Main  | O    | 17.28         |
| SER             | 13     | Side  | OG   | ARG           | 30     | Side  | NE   | 10.19         |
| GLY             | 15     | Main  | O    | ASN           | 37     | Side  | ND2  | 19.58         |
| GLY             | 15     | Main  | N    | ASP           | 187    | Side  | OD2  | 65.03         |
| GLY             | 15     | Main  | N    | ASP           | 187    | Side  | OD1  | 16.18         |
| GLY             | 17     | Main  | N    | GLU           | 288    | Side  | OE2  | 68.03         |
| GLY             | 17     | Main  | N    | GLU           | 288    | Side  | OE1  | 47.45         |
| ARG             | 18     | Side  | NH2  | HIS           | 113    | Side  | ND1  | 16.98         |
| ARG             | 18     | Side  | NH2  | HIS           | 113    | Side  | ND1  | 16.88         |
| ARG             | 18     | Side  | NE   | TYR           | 116    | Side  | OH   | 26.57         |
| ARG             | 18     | Side  | NH2  | TYR           | 116    | Side  | OH   | 18.68         |
| ARG             | 18     | Side  | NH1  | THR           | 117    | Side  | OG1  | 85.81         |
| ARG             | 18     | Side  | NH1  | THR           | 117    | Side  | OG1  | 47.75         |
| ARG             | 18     | Side  | NH2  | THR           | 117    | Side  | OG1  | 25.27         |
| ARG             | 18     | Side  | NH1  | ASP           | 171    | Side  | OD1  | 95.40         |
| ARG             | 18     | Side  | NH2  | ASP           | 171    | Side  | OD2  | 92.81         |
| ARG             | 18     | Side  | NH1  | ASP           | 171    | Side  | OD2  | 73.93         |
| ARG             | 18     | Side  | NH2  | ASP           | 171    | Side  | OD1  | 39.16         |

|     |    |      |     |     |     |      |     |       |
|-----|----|------|-----|-----|-----|------|-----|-------|
| ARG | 18 | Side | NH1 | HIS | 203 | Side | NE2 | 51.65 |
| ARG | 18 | Side | NH1 | HIS | 203 | Side | ND1 | 33.37 |
| ARG | 18 | Main | N   | GLU | 288 | Side | OE1 | 64.34 |
| ARG | 18 | Main | N   | GLU | 288 | Side | OE2 | 62.14 |
| TRP | 20 | Main | N   | GLN | 200 | Side | OE1 | 13.89 |
| TYR | 21 | Side | OH  | CYS | 28  | Main | O   | 18.78 |
| TYR | 21 | Side | OH  | PHE | 29  | Main | O   | 19.58 |
| TYR | 21 | Side | OH  | GLU | 277 | Side | OE2 | 13.59 |
| TYR | 21 | Side | OH  | ASN | 278 | Side | ND2 | 58.34 |
| TYR | 21 | Side | OH  | ASN | 278 | Side | ND2 | 19.58 |
| THR | 22 | Main | O   | LYS | 25  | Side | NZ  | 35.46 |
| THR | 22 | Side | OG1 | LYS | 25  | Side | NZ  | 85.91 |
| THR | 23 | Side | OG1 | CYS | 28  | Main | O   | 86.21 |
| THR | 23 | Side | OG1 | CYS | 28  | Main | N   | 69.63 |
| THR | 23 | Side | OG1 | CYS | 28  | Main | N   | 44.36 |
| GLY | 24 | Main | N   | LYS | 25  | Main | O   | 20.78 |
| GLY | 24 | Main | N   | GLU | 26  | Main | O   | 51.65 |
| GLN | 25 | Side | NE2 | CYS | 28  | Main | O   | 9.79  |
| ARG | 31 | Side | NH1 | SER | 18  | Side | OG  | 17.78 |
| ARG | 31 | Side | NH2 | GLY | 19  | Main | O   | 21.08 |
| ARG | 31 | Side | NH1 | ASP | 20  | Side | OD1 | 75.12 |
| ARG | 31 | Side | NH2 | ASP | 20  | Side | OD2 | 72.73 |
| ARG | 31 | Side | NH2 | ASP | 20  | Side | OD1 | 57.24 |
| ARG | 31 | Side | NH1 | ASP | 20  | Side | OD2 | 49.15 |
| LYS | 32 | Side | NZ  | ASP | 20  | Side | OD2 | 60.64 |
| LYS | 32 | Side | NZ  | ASP | 20  | Side | OD1 | 54.35 |



## Complex 8:

| V3 loop Residue | Number | Group | Atom | CXCR4 Residue | Number | Group | Atom | Occupancy (%) |
|-----------------|--------|-------|------|---------------|--------|-------|------|---------------|
| CYS             | 1      | Main  | N    | MET           | 24     | Main  | O    | 53.85         |
| CYS             | 1      | Main  | N    | GLU           | 26     | Side  | OE1  | 26.47         |
| CYS             | 1      | Main  | N    | GLU           | 26     | Side  | OE2  | 23.18         |
| ARG             | 3      | Main  | N    | SER           | 23     | Side  | OG   | 30.87         |
| ARG             | 3      | Main  | O    | SER           | 23     | Side  | OG   | 14.49         |
| THR             | 8      | Side  | OG1  | TYS           | 12     | Main  | N    | 30.87         |
| THR             | 8      | Side  | OG1  | TYS           | 12     | Main  | O    | 22.28         |
| THR             | 8      | Side  | OG1  | ASP           | 20     | Side  | OD1  | 11.39         |
| THR             | 8      | Side  | OG1  | ASP           | 20     | Side  | OD2  | 9.69          |
| ARG             | 9      | Side  | NH2  | THR           | 8      | Side  | OG1  | 68.13         |
| ARG             | 9      | Side  | NH1  | THR           | 8      | Side  | OG1  | 61.04         |
| ARG             | 9      | Side  | NH2  | SER           | 9      | Side  | OG   | 78.02         |
| LYS             | 10     | Side  | NZ   | TYS           | 7      | Main  | O    | 13.19         |
| LYS             | 10     | Side  | NZ   | ASP           | 10     | Side  | OD1  | 55.64         |
| LYS             | 10     | Side  | NZ   | ASP           | 10     | Side  | OD2  | 42.36         |
| LYS             | 10     | Side  | NZ   | ASN           | 11     | Main  | O    | 52.45         |
| ARG             | 11     | Side  | NH2  | TYS           | 21     | Side  | OS4  | 25.97         |
| ARG             | 11     | Side  | NH1  | TYS           | 21     | Side  | OS4  | 25.77         |
| ARG             | 11     | Side  | NH1  | TYS           | 21     | Side  | OS3  | 15.08         |
| ARG             | 11     | Side  | NH2  | TYS           | 21     | Side  | OS3  | 14.09         |
| ARG             | 11     | Side  | NH2  | GLU           | 26     | Main  | O    | 10.59         |
| VAL             | 12     | Main  | O    | CYS           | 28     | Main  | N    | 82.62         |
| SER             | 13     | Side  | OG   | LYS           | 25     | Side  | NZ   | 13.69         |
| SER             | 13     | Side  | OG   | GLU           | 277    | Side  | OE2  | 14.99         |
| SER             | 13     | Side  | OG   | GLU           | 277    | Side  | OE1  | 12.29         |
| GLY             | 15     | Main  | O    | HIS           | 281    | Side  | ND1  | 97.40         |
| PRO             | 16     | Main  | O    | HIS           | 281    | Side  | ND1  | 60.94         |
| GLY             | 17     | Main  | O    | ARG           | 30     | Side  | NH1  | 69.23         |
| GLY             | 17     | Main  | N    | GLU           | 288    | Side  | OE1  | 77.02         |
| ARG             | 18     | Side  | NH2  | ASN           | 37     | Side  | OD1  | 87.11         |
| ARG             | 18     | Side  | NH1  | ASN           | 37     | Side  | OD1  | 29.67         |
| ARG             | 18     | Side  | NE   | TRP           | 94     | Side  | NE1  | 61.24         |
| ARG             | 18     | Side  | NH1  | ASP           | 97     | Side  | OD1  | 18.38         |
| ARG             | 18     | Main  | N    | GLU           | 288    | Side  | OE2  | 48.15         |
| ARG             | 18     | Main  | N    | GLU           | 288    | Side  | OE1  | 22.48         |
| ARG             | 18     | Side  | NH2  | GLU           | 288    | Side  | OE2  | 97.30         |
| ARG             | 18     | Side  | NE   | GLU           | 288    | Side  | OE2  | 40.56         |
| TRP             | 20     | Main  | N    | ASP           | 187    | Side  | OD1  | 45.15         |
| TRP             | 20     | Main  | N    | ASP           | 187    | Side  | OD2  | 14.69         |
| TYR             | 21     | Side  | OH   | GLN           | 200    | Side  | NE2  | 58.54         |
| TYR             | 21     | Side  | OH   | ASP           | 262    | Side  | OD1  | 53.85         |
| TYR             | 21     | Side  | OH   | ASP           | 262    | Side  | OD2  | 47.95         |
| THR             | 22     | Side  | OG1  | MET           | 1      | Main  | N    | 88.71         |
| THR             | 22     | Side  | OG1  | TYR           | 190    | Main  | O    | 14.09         |
| GLY             | 24     | Main  | N    | TYS           | 12     | Side  | OS4  | 86.21         |

|     |    |      |     |     |     |      |     |       |
|-----|----|------|-----|-----|-----|------|-----|-------|
| GLY | 24 | Main | O   | TYS | 21  | Main | N   | 29.77 |
| GLY | 24 | Main | N   | ASP | 193 | Side | OD2 | 21.28 |
| GLN | 25 | Side | NE2 | TYS | 21  | Main | O   | 12.99 |
| GLN | 25 | Side | NE2 | ASP | 22  | Main | O   | 41.36 |
| GLN | 25 | Side | NE2 | LYS | 25  | Main | O   | 19.98 |
| ILE | 26 | Main | N   | TYS | 21  | Main | O   | 50.65 |
| ARG | 31 | Main | O   | SER | 9   | Side | OG  | 13.19 |
| HIS | 34 | Side | NE2 | THR | 8   | Side | OG1 | 25.27 |
| HIS | 34 | Side | ND1 | LYS | 25  | Main | O   | 14.49 |

## Complex 9:

| V3 loop Residue | Number | Group | Atom | CXCR4 Residue | Number | Group | Atom | Occupancy (%) |
|-----------------|--------|-------|------|---------------|--------|-------|------|---------------|
| ARG             | 3      | Side  | NH1  | ASP           | 22     | Side  | OD2  | 83.62         |
| ARG             | 3      | Side  | NE   | ASP           | 22     | Side  | OD2  | 77.12         |
| ARG             | 3      | Side  | NH1  | ASP           | 22     | Side  | OD1  | 52.85         |
| ARG             | 3      | Side  | NE   | ASP           | 22     | Side  | OD1  | 14.19         |
| ARG             | 3      | Side  | NH1  | SER           | 23     | Side  | OG   | 56.34         |
| ARG             | 3      | Side  | NH2  | SER           | 23     | Side  | OG   | 39.26         |
| ARG             | 3      | Side  | NH2  | LEU           | 267    | Main  | O    | 54.95         |
| ARG             | 3      | Side  | NH2  | GLU           | 268    | Side  | OE1  | 32.97         |
| ARG             | 3      | Side  | NH2  | GLU           | 268    | Side  | OE2  | 21.48         |
| THR             | 8      | Main  | N    | GLY           | 19     | Main  | O    | 89.91         |
| ARG             | 9      | Side  | NH2  | ILE           | 4      | Main  | O    | 16.88         |
| ARG             | 9      | Side  | NE   | SER           | 5      | Side  | OG   | 0.10          |
| ARG             | 9      | Side  | NH1  | GLU           | 14     | Side  | OE2  | 63.94         |
| ARG             | 9      | Side  | NH2  | GLU           | 14     | Side  | OE2  | 56.94         |
| ARG             | 9      | Side  | NH1  | GLU           | 14     | Side  | OE1  | 55.64         |
| ARG             | 9      | Side  | NH2  | GLU           | 14     | Side  | OE1  | 44.26         |
| ARG             | 9      | Side  | NH2  | PRO           | 191    | Main  | O    | 64.24         |
| ARG             | 9      | Side  | NE   | PRO           | 191    | Main  | O    | 16.78         |
| LYS             | 10     | Side  | NZ   | GLY           | 19     | Main  | O    | 18.68         |
| LYS             | 10     | Side  | NZ   | TYS           | 21     | Main  | O    | 26.47         |
| LYS             | 10     | Side  | NZ   | SER           | 23     | Main  | O    | 89.01         |
| LYS             | 10     | Main  | N    | PRO           | 191    | Main  | O    | 14.89         |
| LYS             | 10     | Side  | NZ   | ASP           | 193    | Side  | OD2  | 99.10         |
| ARG             | 11     | Side  | NH2  | MET           | 1      | Main  | O    | 20.28         |
| ARG             | 11     | Side  | NH2  | GLU           | 2      | Side  | OE1  | 12.89         |
| ARG             | 11     | Side  | NH2  | GLU           | 2      | Side  | OE2  | 9.89          |
| ARG             | 11     | Side  | NE   | GLY           | 3      | Main  | O    | 24.18         |
| VAL             | 12     | Main  | N    | GLY           | 3      | Main  | O    | 17.68         |
| LEU             | 14     | Main  | O    | ARG           | 30     | Side  | NH2  | 11.79         |
| PRO             | 16     | Main  | O    | ARG           | 30     | Side  | NH1  | 32.07         |
| PRO             | 16     | Main  | O    | ASN           | 37     | Side  | ND2  | 21.28         |
| GLY             | 17     | Main  | N    | ASP           | 97     | Side  | OD1  | 32.97         |
| GLY             | 17     | Main  | N    | ASP           | 97     | Side  | OD2  | 24.78         |
| GLY             | 17     | Main  | N    | ALA           | 98     | Main  | O    | 9.89          |
| ARG             | 18     | Side  | NH1  | HIS           | 113    | Side  | NE2  | 58.34         |
| ARG             | 18     | Side  | NH1  | THR           | 117    | Side  | OG1  | 11.89         |
| ARG             | 18     | Side  | NH2  | HIS           | 203    | Side  | NE2  | 20.38         |
| ARG             | 18     | Side  | NH1  | HIS           | 203    | Side  | NE2  | 13.39         |
| ARG             | 18     | Side  | NH2  | TYR           | 255    | Side  | OH   | 30.37         |
| ARG             | 18     | Side  | NH2  | TYR           | 255    | Side  | OH   | 22.08         |
| ARG             | 18     | Side  | NH2  | GLU           | 288    | Side  | OE2  | 82.22         |
| ARG             | 18     | Side  | NH2  | GLU           | 288    | Side  | OE1  | 80.02         |
| ARG             | 18     | Side  | NE   | GLU           | 288    | Side  | OE1  | 77.52         |
| ARG             | 18     | Side  | NE   | GLU           | 288    | Side  | OE2  | 61.04         |
| TRP             | 20     | Side  | NE1  | HIS           | 113    | Side  | NE2  | 35.16         |

|     |    |      |     |     |     |      |     |       |
|-----|----|------|-----|-----|-----|------|-----|-------|
| TRP | 20 | Side | NE1 | ARG | 188 | Side | NH2 | 18.88 |
| TRP | 20 | Side | NE1 | ARG | 188 | Side | NH2 | 17.68 |
| TRP | 20 | Side | NE1 | ARG | 188 | Side | NE  | 12.09 |
| TRP | 20 | Side | NE1 | TYR | 190 | Side | OH  | 39.56 |
| TRP | 20 | Main | O   | HIS | 281 | Side | ND1 | 54.45 |
| TYR | 21 | Side | OH  | ARG | 30  | Side | NH1 | 29.47 |
| TYR | 21 | Side | OH  | GLU | 31  | Main | N   | 19.58 |
| TYR | 21 | Side | OH  | GLU | 31  | Main | O   | 9.69  |
| TYR | 21 | Side | OH  | ASN | 33  | Side | ND2 | 10.19 |
| TYR | 21 | Side | OH  | ASN | 37  | Side | ND2 | 44.66 |
| THR | 22 | Main | O   | LYS | 25  | Side | NZ  | 57.54 |
| THR | 22 | Side | OG1 | LYS | 25  | Side | NZ  | 85.51 |
| THR | 23 | Side | OG1 | GLU | 26  | Main | O   | 12.09 |
| THR | 23 | Side | OG1 | CYS | 28  | Main | N   | 67.43 |
| THR | 23 | Side | OG1 | CYS | 28  | Main | O   | 50.95 |
| THR | 23 | Side | OG1 | CYS | 28  | Main | N   | 19.88 |
| GLY | 24 | Main | N   | LYS | 25  | Main | O   | 26.77 |
| GLY | 24 | Main | N   | GLU | 26  | Main | O   | 44.46 |
| GLN | 25 | Side | NE2 | GLU | 2   | Main | O   | 29.97 |
| ARG | 31 | Main | N   | ASP | 20  | Side | OD1 | 46.05 |
| ARG | 31 | Side | NH2 | ASP | 20  | Side | OD2 | 99.30 |
| ARG | 31 | Side | NE  | ASP | 20  | Side | OD2 | 98.20 |
| ARG | 31 | Side | NH2 | TYS | 21  | Side | OS3 | 58.44 |
| ARG | 31 | Side | NH2 | TYS | 21  | Side | OS4 | 46.25 |
| ARG | 31 | Side | NH2 | TYS | 21  | Side | OS2 | 41.26 |
| ARG | 31 | Side | NH1 | TYS | 21  | Side | OS3 | 38.96 |
| ARG | 31 | Side | NH1 | TYS | 21  | Side | OS4 | 34.57 |
| ARG | 31 | Side | NH1 | TYS | 21  | Side | OS2 | 21.88 |
| LYS | 32 | Side | NZ  | TYS | 21  | Side | OS3 | 29.47 |
| LYS | 32 | Side | NZ  | TYS | 21  | Side | OS2 | 27.57 |
| LYS | 32 | Side | NZ  | TYS | 21  | Side | OS4 | 13.09 |
| HIS | 34 | Side | ND1 | ASP | 20  | Side | OD2 | 42.06 |

## Complex 10:

| V3 loop Residue | Number | Group | Atom | CXCR4 Residue | Number | Group | Atom | Occupancy (%) |
|-----------------|--------|-------|------|---------------|--------|-------|------|---------------|
| CYS             | 1      | Main  | N    | GLU           | 15     | Side  | OE1  | 26.87         |
| CYS             | 1      | Main  | N    | GLU           | 15     | Side  | OE2  | 23.28         |
| CYS             | 1      | Main  | O    | MET           | 16     | Main  | N    | 47.05         |
| THR             | 2      | Main  | O    | MET           | 16     | Main  | N    | 16.08         |
| ASN             | 5      | Side  | ND2  | TYS           | 12     | Side  | OS2  | 25.47         |
| ASN             | 5      | Side  | ND2  | TYS           | 12     | Side  | OS3  | 13.09         |
| ASN             | 5      | Main  | N    | GLU           | 14     | Side  | OE2  | 91.01         |
| ASN             | 5      | Main  | N    | GLU           | 14     | Side  | OE1  | 30.87         |
| ASN             | 5      | Side  | ND2  | GLU           | 14     | Side  | OE2  | 47.75         |
| ASN             | 5      | Side  | ND2  | GLU           | 14     | Side  | OE1  | 9.69          |
| ASN             | 5      | Side  | ND2  | MET           | 16     | Main  | O    | 14.19         |
| ASN             | 5      | Side  | ND2  | GLY           | 17     | Main  | O    | 15.38         |
| THR             | 8      | Main  | O    | ASP           | 10     | Main  | N    | 70.83         |
| THR             | 8      | Main  | N    | ASP           | 10     | Side  | OD1  | 18.38         |
| THR             | 8      | Side  | OG1  | TYS           | 12     | Side  | OS4  | 26.07         |
| THR             | 8      | Side  | OG1  | GLU           | 14     | Side  | OE1  | 13.99         |
| ARG             | 9      | Side  | NH2  | THR           | 8      | Side  | OG1  | 15.68         |
| ARG             | 9      | Side  | NH2  | SER           | 9      | Side  | OG   | 58.64         |
| ARG             | 9      | Side  | NE   | SER           | 9      | Side  | OG   | 13.59         |
| ARG             | 9      | Side  | NH2  | ASP           | 10     | Side  | OD1  | 16.58         |
| ARG             | 9      | Side  | NH2  | ASN           | 11     | Side  | OD1  | 10.19         |
| LYS             | 10     | Side  | NZ   | TYS           | 12     | Side  | OS4  | 31.97         |
| LYS             | 10     | Side  | NZ   | TYS           | 12     | Side  | OS3  | 24.08         |
| LYS             | 10     | Side  | NZ   | TYR           | 190    | Main  | O    | 47.05         |
| LYS             | 10     | Side  | NZ   | PRO           | 191    | Main  | O    | 25.37         |
| LYS             | 10     | Side  | NZ   | ASP           | 193    | Side  | OD2  | 54.75         |
| LYS             | 10     | Side  | NZ   | ASP           | 193    | Side  | OD1  | 40.96         |
| ARG             | 11     | Side  | NH2  | LYS           | 25     | Main  | O    | 38.36         |
| ARG             | 11     | Side  | NH2  | GLU           | 26     | Main  | O    | 60.94         |
| ARG             | 11     | Side  | NH1  | GLU           | 26     | Main  | O    | 34.67         |
| ARG             | 11     | Side  | NH2  | CYS           | 28     | Main  | O    | 17.38         |
| SER             | 13     | Side  | OG   | GLU           | 277    | Side  | OE2  | 35.86         |
| SER             | 13     | Side  | OG   | GLU           | 277    | Side  | OE1  | 20.28         |
| GLY             | 15     | Main  | O    | GLN           | 200    | Side  | NE2  | 32.77         |
| GLY             | 17     | Main  | N    | TYR           | 255    | Side  | OH   | 24.78         |
| GLY             | 17     | Main  | N    | TYR           | 255    | Side  | OH   | 12.39         |
| ARG             | 18     | Side  | NH2  | ASN           | 37     | Side  | ND2  | 71.73         |
| ARG             | 18     | Side  | NH2  | ASN           | 37     | Side  | ND2  | 20.88         |
| ARG             | 18     | Side  | NH1  | HIS           | 281    | Side  | NE2  | 96.60         |
| ARG             | 18     | Side  | NH2  | HIS           | 281    | Side  | NE2  | 27.77         |
| ARG             | 18     | Side  | NH1  | SER           | 285    | Side  | OG   | 99.80         |
| ARG             | 18     | Main  | N    | GLU           | 288    | Side  | OE2  | 98.20         |
| TRP             | 20     | Side  | NE1  | ASP           | 181    | Side  | OD1  | 25.47         |
| TRP             | 20     | Side  | NE1  | ASP           | 181    | Side  | OD2  | 23.48         |
| TRP             | 20     | Main  | O    | ARG           | 188    | Main  | N    | 73.63         |

|     |    |      |     |     |     |      |     |       |
|-----|----|------|-----|-----|-----|------|-----|-------|
| TYR | 21 | Side | OH  | GLN | 200 | Side | NE2 | 51.05 |
| TYR | 21 | Side | OH  | ASP | 262 | Side | OD2 | 69.73 |
| TYR | 21 | Side | OH  | ASP | 262 | Side | OD1 | 26.27 |
| THR | 22 | Main | N   | ARG | 188 | Main | O   | 18.98 |
| THR | 22 | Side | OG1 | TYR | 190 | Main | N   | 51.25 |
| THR | 23 | Main | O   | LYS | 25  | Side | NZ  | 10.69 |
| THR | 23 | Side | OG1 | LYS | 25  | Side | NZ  | 38.26 |
| GLY | 24 | Main | O   | LYS | 25  | Side | NZ  | 10.59 |
| GLY | 24 | Main | N   | ASP | 193 | Side | OD2 | 18.28 |
| GLN | 25 | Side | NE2 | SER | 23  | Main | O   | 15.38 |
| GLN | 25 | Side | OE1 | LYS | 25  | Main | N   | 80.72 |
| ILE | 26 | Main | O   | TYS | 21  | Main | N   | 29.97 |
| ARG | 31 | Side | NH2 | ASP | 10  | Side | OD1 | 71.73 |
| ARG | 31 | Side | NH1 | ASP | 10  | Side | OD2 | 61.44 |
| ARG | 31 | Side | NH1 | ASP | 10  | Side | OD1 | 42.26 |
| ARG | 31 | Side | NH2 | ASP | 10  | Side | OD2 | 20.68 |
| ARG | 31 | Side | NH1 | THR | 13  | Side | OG1 | 13.19 |

## Complex 11:

| V3 loop Residue | Number | Group | Atom | CXCR4 Residue | Number | Group | Atom | Occupancy (%) |
|-----------------|--------|-------|------|---------------|--------|-------|------|---------------|
| CYS             | 1      | Main  | N    | SER           | 23     | Side  | OG   | 55.64         |
| CYS             | 1      | Main  | O    | SER           | 23     | Side  | OG   | 11.19         |
| ARG             | 3      | Side  | NH2  | SER           | 23     | Side  | OG   | 12.99         |
| ASN             | 5      | Side  | ND2  | SER           | 18     | Main  | O    | 39.66         |
| ASN             | 5      | Side  | ND2  | GLY           | 19     | Main  | O    | 36.26         |
| ASN             | 6      | Main  | N    | ASP           | 20     | Side  | OD1  | 84.72         |
| ASN             | 6      | Main  | N    | ASP           | 20     | Side  | OD2  | 23.38         |
| ASN             | 6      | Side  | ND2  | ASP           | 20     | Side  | OD2  | 53.65         |
| ASN             | 6      | Side  | ND2  | ASP           | 20     | Side  | OD1  | 53.35         |
| ASN             | 6      | Side  | ND2  | ASP           | 22     | Main  | O    | 9.99          |
| ASN             | 6      | Side  | OD1  | SER           | 23     | Side  | OG   | 25.07         |
| ASN             | 6      | Side  | ND2  | SER           | 23     | Side  | OG   | 16.48         |
| ASN             | 7      | Side  | ND2  | TYS           | 12     | Main  | O    | 87.71         |
| ASN             | 7      | Side  | ND2  | TYS           | 12     | Side  | OS4  | 41.26         |
| ASN             | 7      | Side  | ND2  | TYS           | 12     | Side  | OS2  | 31.37         |
| ASN             | 7      | Side  | ND2  | TYS           | 12     | Side  | OS3  | 26.37         |
| THR             | 8      | Side  | OG1  | ASN           | 11     | Side  | ND2  | 94.51         |
| ARG             | 9      | Main  | O    | SER           | 9      | Main  | N    | 64.54         |
| ARG             | 9      | Side  | NH1  | TYS           | 12     | Side  | OH   | 50.45         |
| ARG             | 9      | Side  | NH1  | TYS           | 12     | Side  | OS3  | 37.16         |
| ARG             | 9      | Side  | NH2  | TYS           | 12     | Side  | OS4  | 27.87         |
| ARG             | 9      | Side  | NH1  | TYS           | 12     | Side  | OS4  | 24.98         |
| ARG             | 9      | Side  | NH1  | TYS           | 12     | Side  | OS2  | 24.38         |
| ARG             | 9      | Side  | NH2  | TYS           | 12     | Side  | OS2  | 20.68         |
| ARG             | 9      | Side  | NH2  | TYS           | 12     | Side  | OS3  | 17.58         |
| ARG             | 9      | Side  | NH2  | GLY           | 19     | Main  | O    | 79.82         |
| ARG             | 9      | Side  | NH1  | GLY           | 19     | Main  | O    | 30.27         |
| ARG             | 9      | Side  | NH2  | ASP           | 20     | Main  | O    | 13.79         |
| ARG             | 9      | Side  | NH2  | ASP           | 20     | Side  | OD1  | 34.47         |
| ARG             | 9      | Side  | NH1  | ASP           | 193    | Side  | OD1  | 88.91         |
| ARG             | 9      | Side  | NH1  | ASP           | 193    | Side  | OD2  | 78.72         |
| LYS             | 10     | Side  | NZ   | THR           | 8      | Side  | OG1  | 23.58         |
| ARG             | 11     | Main  | N    | TYS           | 7      | Main  | O    | 42.76         |
| ARG             | 11     | Side  | NH1  | TYS           | 7      | Main  | O    | 30.47         |
| ARG             | 11     | Side  | NH2  | ASP           | 10     | Side  | OD1  | 89.61         |
| ARG             | 11     | Side  | NH1  | ASP           | 10     | Side  | OD2  | 88.01         |
| ARG             | 11     | Side  | NH2  | ASP           | 10     | Side  | OD2  | 69.43         |
| ARG             | 11     | Side  | NH1  | ASP           | 10     | Side  | OD1  | 56.74         |
| ARG             | 11     | Side  | NH2  | PRO           | 191    | Main  | O    | 94.41         |
| ARG             | 11     | Side  | NE   | PRO           | 191    | Main  | O    | 44.76         |
| SER             | 13     | Side  | OG   | ASP           | 181    | Main  | N    | 15.78         |
| SER             | 13     | Side  | OG   | ASP           | 181    | Side  | OD1  | 74.53         |
| SER             | 13     | Side  | OG   | ASP           | 181    | Side  | OD2  | 61.54         |
| GLY             | 15     | Main  | O    | ARG           | 30     | Side  | NH2  | 80.82         |
| GLY             | 15     | Main  | O    | ARG           | 30     | Side  | NH1  | 69.13         |

|     |    |      |     |     |     |      |     |       |
|-----|----|------|-----|-----|-----|------|-----|-------|
| PRO | 16 | Main | O   | ARG | 183 | Side | NH1 | 35.86 |
| GLY | 17 | Main | N   | TYR | 45  | Side | OH  | 21.08 |
| GLY | 17 | Main | N   | GLU | 288 | Side | OE1 | 49.75 |
| ARG | 18 | Side | NH2 | TYR | 45  | Side | OH  | 13.49 |
| ARG | 18 | Side | NH1 | TRP | 94  | Side | NE1 | 22.48 |
| ARG | 18 | Side | NH2 | TRP | 94  | Side | NE1 | 13.79 |
| ARG | 18 | Side | NH1 | HIS | 113 | Side | NE2 | 82.82 |
| ARG | 18 | Side | NE  | TYR | 116 | Side | OH  | 23.78 |
| ARG | 18 | Side | NE  | TYR | 116 | Side | OH  | 22.58 |
| ARG | 18 | Main | O   | TYR | 190 | Side | OH  | 14.89 |
| ARG | 18 | Main | N   | GLU | 288 | Side | OE1 | 31.37 |
| ARG | 18 | Side | NE  | GLU | 288 | Side | OE2 | 97.80 |
| ARG | 18 | Side | NH2 | GLU | 288 | Side | OE1 | 97.40 |
| ARG | 18 | Side | NE  | GLU | 288 | Side | OE1 | 68.63 |
| ARG | 18 | Side | NH2 | GLU | 288 | Side | OE2 | 41.26 |
| VAL | 19 | Main | O   | TYR | 190 | Side | OH  | 14.59 |
| TRP | 20 | Side | NE1 | ARG | 188 | Side | NH2 | 22.08 |
| TRP | 20 | Side | NE1 | ARG | 188 | Side | NH2 | 20.28 |
| TRP | 20 | Side | NE1 | TYR | 190 | Side | OH  | 34.47 |
| TYR | 21 | Side | OH  | SER | 178 | Side | OG  | 9.59  |
| TYR | 21 | Side | OH  | ASP | 187 | Side | OD1 | 47.25 |
| THR | 22 | Side | OG1 | GLU | 277 | Side | OE2 | 89.21 |
| THR | 23 | Main | O   | LYS | 25  | Side | NZ  | 89.71 |
| THR | 23 | Side | OG1 | LYS | 25  | Side | NZ  | 64.44 |
| GLY | 24 | Main | O   | CYS | 28  | Main | N   | 95.80 |
| ILE | 26 | Main | O   | LYS | 25  | Main | N   | 88.81 |
| ILE | 26 | Main | N   | LYS | 25  | Main | O   | 63.84 |
| GLY | 28 | Main | N   | SER | 23  | Main | O   | 26.87 |
| ASP | 29 | Side | OD2 | ASN | 11  | Side | ND2 | 65.23 |
| ASP | 29 | Side | OD1 | ASN | 11  | Side | ND2 | 63.14 |
| ARG | 31 | Side | NE  | ASN | 11  | Side | OD1 | 23.88 |
| ARG | 31 | Side | NH1 | GLU | 14  | Side | OE1 | 81.92 |
| ARG | 31 | Side | NH1 | GLU | 14  | Side | OE2 | 80.52 |
| ARG | 31 | Side | NH2 | GLU | 14  | Side | OE1 | 56.64 |
| ARG | 31 | Side | NH2 | GLU | 14  | Side | OE2 | 56.14 |
| LYS | 32 | Side | NZ  | GLU | 14  | Side | OE1 | 17.28 |
| LYS | 32 | Side | NZ  | GLU | 14  | Side | OE2 | 10.69 |



## Complex 12:

| V3 loop Residue | Number | Group | Atom | CXCR4 Residue | Number | Group | Atom | Occupancy (%) |
|-----------------|--------|-------|------|---------------|--------|-------|------|---------------|
| ARG             | 3      | Side  | NH2  | ASP           | 22     | Side  | OD1  | 64.44         |
| ARG             | 3      | Side  | NH2  | ASP           | 22     | Side  | OD2  | 24.38         |
| ARG             | 3      | Side  | NH1  | ASP           | 22     | Side  | OD1  | 17.98         |
| ARG             | 3      | Side  | NH2  | GLU           | 268    | Side  | OE1  | 32.97         |
| ARG             | 3      | Side  | NH2  | GLU           | 268    | Side  | OE2  | 27.77         |
| ARG             | 3      | Side  | NH1  | GLU           | 268    | Side  | OE1  | 26.47         |
| ARG             | 3      | Side  | NH1  | GLU           | 268    | Side  | OE2  | 23.48         |
| ASN             | 5      | Side  | ND2  | TYS           | 21     | Main  | O    | 23.48         |
| ASN             | 5      | Side  | ND2  | ASP           | 22     | Main  | O    | 24.68         |
| ASN             | 5      | Side  | ND2  | SER           | 23     | Main  | O    | 36.76         |
| ASN             | 6      | Main  | N    | SER           | 23     | Main  | O    | 80.32         |
| ASN             | 6      | Side  | ND2  | SER           | 23     | Main  | O    | 25.67         |
| THR             | 8      | Side  | OG1  | LYS           | 25     | Main  | N    | 44.16         |
| ARG             | 9      | Side  | NH1  | SER           | 9      | Side  | OG   | 39.36         |
| ARG             | 9      | Side  | NH2  | SER           | 9      | Side  | OG   | 32.17         |
| ARG             | 9      | Side  | NH1  | ASP           | 10     | Side  | OD2  | 22.48         |
| ARG             | 9      | Side  | NH2  | ASP           | 10     | Side  | OD2  | 19.38         |
| ARG             | 9      | Side  | NH1  | ASN           | 11     | Main  | O    | 14.19         |
| ARG             | 9      | Side  | NE   | ASN           | 11     | Side  | OD1  | 50.65         |
| ARG             | 9      | Side  | NH2  | ASN           | 11     | Side  | OD1  | 48.75         |
| LYS             | 10     | Main  | N    | TYS           | 12     | Side  | OS3  | 37.26         |
| LYS             | 10     | Side  | NZ   | TYS           | 12     | Side  | OS2  | 27.27         |
| LYS             | 10     | Side  | NZ   | TYS           | 12     | Side  | OS4  | 25.97         |
| LYS             | 10     | Side  | NZ   | TYS           | 12     | Side  | OS3  | 16.98         |
| LYS             | 10     | Side  | NZ   | ASP           | 20     | Main  | O    | 96.90         |
| LYS             | 10     | Side  | NZ   | ASP           | 193    | Side  | OD1  | 97.00         |
| LYS             | 10     | Side  | NZ   | ASP           | 193    | Side  | OD2  | 60.24         |
| LYS             | 10     | Side  | NZ   | GLU           | 268    | Side  | OE1  | 32.17         |
| LYS             | 10     | Side  | NZ   | GLU           | 268    | Side  | OE2  | 14.99         |
| ARG             | 11     | Main  | O    | MET           | 1      | Main  | N    | 15.18         |
| ARG             | 11     | Side  | NE   | MET           | 1      | Main  | O    | 54.85         |
| ARG             | 11     | Side  | NH1  | MET           | 1      | Main  | O    | 53.15         |
| ARG             | 11     | Side  | NH1  | ASP           | 10     | Side  | OD2  | 76.82         |
| ARG             | 11     | Side  | NH1  | ASP           | 10     | Side  | OD1  | 60.24         |
| ARG             | 11     | Side  | NH2  | ASP           | 10     | Side  | OD1  | 56.34         |
| ARG             | 11     | Side  | NE   | ASP           | 10     | Side  | OD2  | 28.57         |
| ARG             | 11     | Side  | NH2  | ASP           | 10     | Side  | OD2  | 26.87         |
| ARG             | 11     | Side  | NE   | ASP           | 10     | Side  | OD1  | 20.88         |
| ARG             | 11     | Side  | NH2  | ASN           | 11     | Main  | O    | 14.49         |
| ARG             | 11     | Side  | NH2  | TYR           | 190    | Main  | O    | 38.46         |
| ARG             | 11     | Side  | NH1  | TYR           | 190    | Main  | O    | 12.89         |
| VAL             | 12     | Main  | O    | MET           | 1      | Main  | N    | 20.08         |
| SER             | 13     | Side  | OG   | MET           | 1      | Main  | N    | 97.20         |
| SER             | 13     | Side  | OG   | GLU           | 2      | Main  | O    | 17.08         |
| LEU             | 14     | Main  | N    | ASP           | 187    | Side  | OD2  | 47.95         |

|     |    |      |     |     |     |      |     |       |
|-----|----|------|-----|-----|-----|------|-----|-------|
| LEU | 14 | Main | N   | ASP | 187 | Side | OD1 | 46.15 |
| GLY | 15 | Main | O   | ARG | 183 | Side | NH1 | 14.79 |
| ARG | 18 | Side | NH1 | THR | 117 | Side | OG1 | 92.71 |
| ARG | 18 | Side | NH1 | THR | 117 | Side | OG1 | 38.76 |
| ARG | 18 | Side | NH1 | ASP | 171 | Side | OD2 | 75.42 |
| ARG | 18 | Main | O   | ARG | 188 | Side | NH2 | 99.20 |
| ARG | 18 | Side | NH1 | HIS | 203 | Side | NE2 | 99.00 |
| ARG | 18 | Side | NH2 | HIS | 203 | Side | NE2 | 97.00 |
| ARG | 18 | Side | NH2 | TYR | 255 | Side | OH  | 90.61 |
| ARG | 18 | Side | NH2 | TYR | 255 | Side | OH  | 68.73 |
| ARG | 18 | Main | N   | GLU | 288 | Side | OE2 | 35.56 |
| ARG | 18 | Side | NH2 | GLU | 288 | Side | OE1 | 97.30 |
| ARG | 18 | Side | NE  | GLU | 288 | Side | OE2 | 61.24 |
| ARG | 18 | Side | NH2 | GLU | 288 | Side | OE2 | 45.35 |
| ARG | 18 | Side | NE  | GLU | 288 | Side | OE1 | 30.37 |
| TRP | 20 | Side | NE1 | ARG | 188 | Side | NH2 | 74.53 |
| TRP | 20 | Side | NE1 | TYR | 190 | Side | OH  | 52.75 |
| TRP | 20 | Side | NE1 | TYR | 190 | Side | OH  | 13.29 |
| TRP | 20 | Main | O   | HIS | 281 | Side | ND1 | 78.02 |
| TYR | 21 | Side | OH  | ARG | 30  | Main | N   | 24.08 |
| TYR | 21 | Side | OH  | ASN | 278 | Side | ND2 | 42.46 |
| TYR | 21 | Side | OH  | ASN | 278 | Side | ND2 | 22.68 |
| THR | 23 | Side | OG1 | MET | 1   | Main | N   | 77.42 |
| GLY | 24 | Main | O   | CYS | 28  | Main | N   | 81.52 |
| GLY | 24 | Main | N   | CYS | 28  | Main | O   | 58.44 |
| GLN | 25 | Side | OE1 | SER | 9   | Main | N   | 13.69 |
| GLN | 25 | Side | NE2 | SER | 9   | Side | OG  | 15.18 |
| ARG | 31 | Side | NH2 | TYS | 12  | Side | OS4 | 47.05 |
| ARG | 31 | Side | NH1 | TYS | 12  | Side | OH  | 40.46 |
| ARG | 31 | Side | NH1 | TYS | 12  | Side | OS4 | 29.67 |
| ARG | 31 | Side | NH2 | TYS | 12  | Side | OS2 | 25.17 |
| ARG | 31 | Side | NH1 | TYS | 12  | Side | OS2 | 12.49 |
| ARG | 31 | Side | NH2 | TYS | 12  | Side | OS3 | 11.49 |
| ARG | 31 | Side | NH2 | ASP | 20  | Side | OD2 | 16.08 |
| ARG | 31 | Side | NH2 | SER | 23  | Main | O   | 11.79 |
| LYS | 32 | Side | NZ  | TYS | 12  | Side | OS3 | 11.49 |
| LYS | 32 | Side | NZ  | ASP | 20  | Side | OD2 | 53.35 |
| LYS | 32 | Side | NZ  | ASP | 20  | Side | OD1 | 51.75 |
| HIS | 34 | Side | ND1 | TYS | 21  | Main | O   | 29.57 |

## Complex 13:

| V3 loop Residue | Number | Group | Atom | CXCR4 Residue | Number | Group | Atom | Occupancy (%) |
|-----------------|--------|-------|------|---------------|--------|-------|------|---------------|
| CYS             | 1      | Main  | N    | GLU           | 31     | Side  | OE2  | 37.56         |
| CYS             | 1      | Main  | N    | GLU           | 31     | Side  | OE1  | 37.06         |
| THR             | 2      | Main  | N    | PRO           | 27     | Main  | O    | 33.37         |
| THR             | 8      | Main  | N    | MET           | 24     | Side  | SD   | 19.28         |
| THR             | 8      | Main  | O    | LYS           | 25     | Main  | N    | 92.41         |
| ARG             | 9      | Side  | NH2  | TYS           | 12     | Side  | OS3  | 24.58         |
| ARG             | 9      | Side  | NH2  | TYS           | 12     | Side  | OS4  | 16.08         |
| ARG             | 9      | Side  | NH1  | TYS           | 12     | Side  | OS4  | 12.59         |
| ARG             | 9      | Side  | NH2  | TYS           | 12     | Side  | OS2  | 10.19         |
| ARG             | 9      | Side  | NH1  | GLU           | 14     | Side  | OE2  | 55.44         |
| ARG             | 9      | Side  | NH1  | GLU           | 14     | Side  | OE1  | 12.09         |
| ARG             | 9      | Side  | NH1  | GLU           | 15     | Main  | O    | 35.96         |
| ARG             | 9      | Side  | NH2  | ASP           | 20     | Side  | OD1  | 94.71         |
| ARG             | 9      | Side  | NH2  | ASP           | 20     | Side  | OD2  | 92.41         |
| ARG             | 9      | Side  | NH1  | ASP           | 20     | Side  | OD1  | 50.85         |
| ARG             | 9      | Side  | NH1  | ASP           | 20     | Side  | OD2  | 28.67         |
| ARG             | 9      | Side  | NH1  | TYS           | 21     | Main  | O    | 25.87         |
| ARG             | 9      | Side  | NH1  | ASP           | 22     | Main  | O    | 18.38         |
| ARG             | 9      | Side  | NH2  | ASP           | 193    | Side  | OD1  | 99.70         |
| ARG             | 9      | Side  | NE   | ASP           | 193    | Side  | OD2  | 88.21         |
| ARG             | 9      | Side  | NH2  | ASP           | 193    | Side  | OD2  | 67.83         |
| ARG             | 9      | Side  | NE   | ASP           | 193    | Side  | OD1  | 40.76         |
| LYS             | 10     | Side  | NZ   | GLU           | 2      | Side  | OE1  | 9.79          |
| LYS             | 10     | Side  | NZ   | GLU           | 2      | Side  | OE2  | 9.69          |
| LYS             | 10     | Side  | NZ   | CYS           | 28     | Main  | O    | 94.51         |
| ARG             | 11     | Side  | NH1  | TYS           | 7      | Main  | O    | 17.08         |
| ARG             | 11     | Side  | NH1  | ASP           | 10     | Side  | OD2  | 76.72         |
| ARG             | 11     | Side  | NH1  | ASP           | 10     | Side  | OD1  | 57.14         |
| ARG             | 11     | Side  | NH2  | ASP           | 10     | Side  | OD1  | 40.46         |
| ARG             | 11     | Side  | NH2  | ASP           | 10     | Side  | OD2  | 30.87         |
| ARG             | 11     | Side  | NH2  | TYR           | 190    | Main  | O    | 71.63         |
| ARG             | 11     | Side  | NH2  | PRO           | 191    | Main  | O    | 47.95         |
| SER             | 13     | Side  | OG   | ARG           | 188    | Main  | O    | 32.97         |
| LEU             | 14     | Main  | O    | ARG           | 188    | Side  | NH2  | 99.70         |
| LEU             | 14     | Main  | O    | ARG           | 188    | Side  | NE   | 42.16         |
| LEU             | 14     | Main  | N    | GLN           | 200    | Side  | OE1  | 66.43         |
| GLY             | 17     | Main  | O    | ASN           | 37     | Side  | ND2  | 39.86         |
| GLY             | 17     | Main  | O    | SER           | 285    | Side  | OG   | 93.11         |
| GLY             | 17     | Main  | N    | GLU           | 288    | Side  | OE1  | 94.81         |
| GLY             | 17     | Main  | N    | GLU           | 288    | Side  | OE2  | 79.92         |
| ARG             | 18     | Side  | NH2  | ASP           | 181    | Side  | OD2  | 25.57         |
| ARG             | 18     | Side  | NH1  | ASP           | 181    | Side  | OD2  | 13.09         |
| VAL             | 19     | Main  | N    | HIS           | 281    | Side  | NE2  | 62.24         |
| VAL             | 19     | Main  | O    | HIS           | 281    | Side  | ND1  | 19.08         |
| VAL             | 19     | Main  | N    | HIS           | 281    | Side  | ND1  | 15.98         |

|     |    |      |     |     |     |      |     |       |
|-----|----|------|-----|-----|-----|------|-----|-------|
| TYR | 21 | Main | O   | GLU | 2   | Main | N   | 17.08 |
| TYR | 21 | Side | OH  | GLU | 277 | Main | O   | 46.65 |
| TYR | 21 | Side | OH  | ASN | 278 | Side | OD1 | 18.48 |
| TYR | 21 | Side | OH  | ASN | 278 | Side | ND2 | 15.58 |
| TYR | 21 | Side | OH  | HIS | 281 | Side | ND1 | 51.85 |
| THR | 22 | Side | OG1 | MET | 1   | Main | N   | 75.92 |
| THR | 23 | Main | N   | MET | 1   | Main | O   | 16.78 |
| THR | 23 | Side | OG1 | GLU | 2   | Side | OE2 | 51.75 |
| THR | 23 | Side | OG1 | GLU | 2   | Side | OE1 | 49.45 |
| GLN | 25 | Side | NE2 | ILE | 6   | Main | O   | 23.68 |
| GLN | 25 | Main | N   | TYS | 7   | Main | O   | 28.57 |
| GLN | 25 | Side | NE2 | THR | 8   | Side | OG1 | 13.49 |
| GLN | 25 | Main | O   | SER | 9   | Main | N   | 66.53 |
| GLN | 25 | Main | O   | ASP | 10  | Main | N   | 53.75 |
| VAL | 27 | Main | N   | ASP | 10  | Main | O   | 13.79 |
| VAL | 27 | Main | N   | ASN | 11  | Side | OD1 | 38.26 |
| VAL | 27 | Main | O   | ASN | 11  | Side | ND2 | 24.58 |
| ARG | 31 | Side | NH1 | GLU | 14  | Side | OE1 | 85.51 |
| ARG | 31 | Side | NH2 | GLU | 14  | Side | OE2 | 81.82 |
| ARG | 31 | Side | NH2 | GLU | 14  | Side | OE1 | 67.83 |
| ARG | 31 | Side | NH1 | GLU | 14  | Side | OE2 | 46.65 |
| ARG | 31 | Side | NH2 | SER | 23  | Main | O   | 96.30 |
| ARG | 31 | Side | NE  | SER | 23  | Main | O   | 49.85 |
| LYS | 32 | Side | NZ  | ASP | 22  | Side | OD2 | 79.02 |
| LYS | 32 | Side | NZ  | ASP | 22  | Side | OD1 | 78.42 |
| LYS | 32 | Side | NZ  | SER | 23  | Side | OG  | 32.77 |

## Complex 14:

| V3 loop Residue | Number | Group | Atom | CXCR4 Residue | Number | Group | Atom | Occupancy (%) |
|-----------------|--------|-------|------|---------------|--------|-------|------|---------------|
| ARG             | 3      | Side  | NH1  | ASP           | 22     | Side  | OD2  | 91.11         |
| ARG             | 3      | Side  | NH2  | ASP           | 22     | Side  | OD1  | 87.61         |
| ARG             | 3      | Side  | NH2  | ASP           | 22     | Side  | OD2  | 74.93         |
| ARG             | 3      | Side  | NH1  | ASP           | 22     | Side  | OD1  | 18.48         |
| ASN             | 5      | Side  | ND2  | ASP           | 20     | Main  | O    | 90.71         |
| ASN             | 5      | Side  | ND2  | ASP           | 22     | Side  | OD2  | 84.32         |
| ASN             | 5      | Side  | ND2  | ASP           | 22     | Side  | OD1  | 79.02         |
| ASN             | 6      | Main  | N    | ASP           | 22     | Side  | OD1  | 42.16         |
| ASN             | 7      | Side  | ND2  | ASP           | 20     | Side  | OD1  | 55.34         |
| ASN             | 7      | Side  | ND2  | ASP           | 20     | Side  | OD2  | 37.06         |
| THR             | 8      | Main  | N    | ASP           | 20     | Side  | OD1  | 53.55         |
| THR             | 8      | Main  | N    | ASP           | 20     | Side  | OD2  | 32.97         |
| THR             | 8      | Side  | OG1  | ASP           | 20     | Main  | O    | 11.59         |
| THR             | 8      | Side  | OG1  | TYS           | 21     | Main  | O    | 22.98         |
| ARG             | 9      | Side  | NH1  | SER           | 5      | Side  | OG   | 21.38         |
| ARG             | 9      | Side  | NH2  | PRO           | 191    | Main  | O    | 95.30         |
| ARG             | 9      | Side  | NH1  | PRO           | 191    | Main  | O    | 74.83         |
| LYS             | 10     | Side  | NZ   | GLY           | 19     | Main  | O    | 88.81         |
| LYS             | 10     | Side  | NZ   | TYS           | 21     | Main  | O    | 97.90         |
| LYS             | 10     | Side  | NZ   | SER           | 23     | Main  | O    | 50.45         |
| LYS             | 10     | Side  | NZ   | ASP           | 193    | Side  | OD2  | 95.90         |
| LYS             | 10     | Side  | NZ   | ASP           | 193    | Side  | OD1  | 23.98         |
| ARG             | 11     | Side  | NH1  | GLU           | 2      | Side  | OE2  | 70.43         |
| ARG             | 11     | Side  | NH1  | GLU           | 2      | Side  | OE1  | 64.54         |
| ARG             | 11     | Side  | NH2  | GLU           | 2      | Side  | OE2  | 62.64         |
| ARG             | 11     | Side  | NH2  | GLU           | 2      | Side  | OE1  | 58.94         |
| ARG             | 11     | Side  | NH1  | TYS           | 7      | Side  | OS4  | 81.32         |
| VAL             | 12     | Main  | N    | TYS           | 7      | Side  | OS2  | 95.90         |
| VAL             | 12     | Main  | N    | TYS           | 7      | Side  | OS4  | 10.29         |
| SER             | 13     | Main  | O    | ARG           | 30     | Side  | NH2  | 38.16         |
| SER             | 13     | Side  | OG   | ARG           | 30     | Side  | NH2  | 19.58         |
| LEU             | 14     | Main  | O    | ARG           | 30     | Side  | NH2  | 54.65         |
| PRO             | 16     | Main  | O    | ASN           | 37     | Side  | ND2  | 38.26         |
| GLY             | 17     | Main  | N    | ASP           | 97     | Side  | OD1  | 91.21         |
| ARG             | 18     | Side  | NH1  | HIS           | 113    | Side  | NE2  | 98.40         |
| ARG             | 18     | Side  | NH2  | TYR           | 116    | Side  | OH   | 11.79         |
| ARG             | 18     | Side  | NH2  | HIS           | 203    | Side  | NE2  | 97.10         |
| ARG             | 18     | Side  | NH1  | HIS           | 203    | Side  | NE2  | 78.62         |
| ARG             | 18     | Side  | NH2  | TYR           | 255    | Side  | OH   | 89.21         |
| ARG             | 18     | Side  | NH2  | TYR           | 255    | Side  | OH   | 68.73         |
| ARG             | 18     | Side  | NE   | GLU           | 288    | Side  | OE2  | 91.21         |
| ARG             | 18     | Side  | NH2  | GLU           | 288    | Side  | OE1  | 83.02         |
| ARG             | 18     | Side  | NH2  | GLU           | 288    | Side  | OE2  | 63.54         |
| ARG             | 18     | Side  | NE   | GLU           | 288    | Side  | OE1  | 62.24         |
| TRP             | 20     | Side  | NE1  | TYR           | 190    | Side  | OH   | 22.88         |

|     |    |      |     |     |     |      |     |       |
|-----|----|------|-----|-----|-----|------|-----|-------|
| TRP | 20 | Side | NE1 | TYR | 190 | Side | OH  | 21.18 |
| TRP | 20 | Side | NE1 | GLN | 200 | Side | OE1 | 25.07 |
| TRP | 20 | Side | NE1 | GLN | 200 | Side | NE2 | 18.38 |
| TRP | 20 | Main | O   | HIS | 281 | Side | ND1 | 67.33 |
| TRP | 20 | Main | N   | SER | 285 | Side | OG  | 19.78 |
| TYR | 21 | Side | OH  | ASN | 33  | Side | ND2 | 10.49 |
| TYR | 21 | Side | OH  | ASN | 37  | Side | ND2 | 18.48 |
| THR | 22 | Main | O   | LYS | 25  | Side | NZ  | 37.76 |
| THR | 22 | Side | OG1 | LYS | 25  | Side | NZ  | 79.02 |
| THR | 23 | Side | OG1 | CYS | 28  | Main | N   | 35.76 |
| THR | 23 | Side | OG1 | CYS | 28  | Main | O   | 26.17 |
| GLY | 24 | Main | N   | LYS | 25  | Main | O   | 46.05 |
| GLY | 24 | Main | N   | GLU | 26  | Main | O   | 13.79 |
| GLN | 25 | Side | NE2 | THR | 8   | Side | OG1 | 10.49 |
| ARG | 31 | Side | NH1 | GLU | 14  | Side | OE1 | 31.67 |
| ARG | 31 | Side | NH1 | GLU | 14  | Side | OE2 | 29.67 |
| ARG | 31 | Side | NH1 | SER | 18  | Side | OG  | 41.96 |
| ARG | 31 | Side | NH1 | SER | 18  | Side | OG  | 31.17 |
| ARG | 31 | Side | NH2 | TYS | 21  | Side | OS3 | 47.95 |
| ARG | 31 | Side | NH1 | TYS | 21  | Side | OS3 | 47.35 |
| ARG | 31 | Side | NH2 | TYS | 21  | Side | OS2 | 43.26 |
| ARG | 31 | Side | NH2 | TYS | 21  | Side | OS4 | 37.86 |
| ARG | 31 | Side | NH1 | TYS | 21  | Side | OS2 | 35.16 |
| ARG | 31 | Side | NH1 | TYS | 21  | Side | OS4 | 34.07 |
| LYS | 32 | Side | NZ  | TYS | 21  | Side | OS2 | 29.77 |
| LYS | 32 | Side | NZ  | TYS | 21  | Side | OS3 | 26.87 |
| LYS | 32 | Side | NZ  | TYS | 21  | Side | OS4 | 23.28 |

## Complex 15:

| V3 loop Residue | Number | Group | Atom | CXCR4 Residue | Number | Group | Atom | Occupancy (%) |
|-----------------|--------|-------|------|---------------|--------|-------|------|---------------|
| CYS             | 1      | Main  | N    | ASP           | 20     | Main  | O    | 58.84         |
| CYS             | 1      | Main  | N    | ASP           | 20     | Side  | OD2  | 81.52         |
| CYS             | 1      | Main  | N    | ASP           | 20     | Side  | OD1  | 41.26         |
| CYS             | 1      | Main  | N    | TYS           | 21     | Main  | O    | 58.04         |
| CYS             | 1      | Main  | N    | GLU           | 268    | Side  | OE1  | 43.76         |
| CYS             | 1      | Main  | N    | GLU           | 268    | Side  | OE2  | 15.88         |
| ASN             | 5      | Side  | ND2  | TYS           | 12     | Side  | OS2  | 39.56         |
| ASN             | 6      | Main  | N    | TYS           | 12     | Side  | OS4  | 45.45         |
| ASN             | 6      | Main  | N    | TYS           | 12     | Side  | OS2  | 21.18         |
| ASN             | 7      | Main  | O    | ASN           | 11     | Main  | N    | 22.88         |
| ASN             | 7      | Main  | O    | ASN           | 11     | Side  | ND2  | 18.38         |
| ASN             | 7      | Main  | O    | TYS           | 12     | Main  | N    | 36.76         |
| ASN             | 7      | Side  | ND2  | TYS           | 12     | Main  | O    | 22.08         |
| ASN             | 7      | Side  | ND2  | GLU           | 14     | Side  | OE1  | 17.68         |
| ASN             | 7      | Side  | ND2  | GLU           | 14     | Side  | OE2  | 14.69         |
| THR             | 8      | Main  | O    | SER           | 9      | Main  | N    | 45.75         |
| THR             | 8      | Side  | OG1  | ASN           | 11     | Side  | OD1  | 22.98         |
| THR             | 8      | Side  | OG1  | ASN           | 11     | Side  | ND2  | 18.98         |
| ARG             | 9      | Side  | NE   | TYS           | 12     | Side  | OS4  | 90.61         |
| ARG             | 9      | Side  | NH2  | TYS           | 12     | Side  | OS4  | 23.68         |
| ARG             | 9      | Side  | NE   | TYS           | 12     | Side  | OS3  | 14.89         |
| ARG             | 9      | Side  | NH2  | ASP           | 20     | Side  | OD1  | 22.98         |
| ARG             | 9      | Side  | NH2  | TYS           | 21     | Main  | O    | 17.38         |
| ARG             | 9      | Side  | NH1  | TYS           | 21     | Main  | O    | 13.39         |
| ARG             | 9      | Side  | NH1  | ASP           | 22     | Main  | O    | 30.27         |
| ARG             | 9      | Side  | NH2  | ASP           | 22     | Main  | O    | 13.29         |
| LYS             | 10     | Side  | NZ   | ILE           | 6      | Main  | O    | 25.37         |
| LYS             | 10     | Side  | NZ   | THR           | 8      | Side  | OG1  | 29.17         |
| LYS             | 10     | Side  | NZ   | SER           | 9      | Side  | OG   | 15.28         |
| ARG             | 11     | Main  | O    | MET           | 1      | Main  | N    | 28.97         |
| ARG             | 11     | Side  | NH1  | TYS           | 7      | Main  | O    | 15.88         |
| ARG             | 11     | Side  | NH2  | ASP           | 10     | Side  | OD1  | 99.30         |
| ARG             | 11     | Side  | NH1  | ASP           | 10     | Side  | OD2  | 99.30         |
| ARG             | 11     | Side  | NH1  | ASP           | 10     | Side  | OD1  | 54.65         |
| ARG             | 11     | Side  | NH2  | ASP           | 10     | Side  | OD2  | 41.26         |
| ARG             | 11     | Side  | NH2  | PRO           | 191    | Main  | O    | 46.75         |
| ARG             | 11     | Side  | NE   | PRO           | 191    | Main  | O    | 40.86         |
| SER             | 13     | Side  | OG   | MET           | 1      | Main  | N    | 62.04         |
| PRO             | 16     | Main  | O    | ASN           | 37     | Side  | ND2  | 10.79         |
| PRO             | 16     | Main  | O    | ARG           | 183    | Side  | NH1  | 84.12         |
| PRO             | 16     | Main  | O    | ARG           | 183    | Side  | NH2  | 52.35         |
| GLY             | 17     | Main  | N    | GLU           | 288    | Side  | OE1  | 78.02         |
| ARG             | 18     | Side  | NH2  | TYR           | 45     | Side  | OH   | 98.30         |
| ARG             | 18     | Side  | NH1  | TYR           | 45     | Side  | OH   | 43.46         |
| ARG             | 18     | Side  | NH1  | TRP           | 94     | Side  | NE1  | 50.85         |

|     |    |      |     |     |     |      |     |       |
|-----|----|------|-----|-----|-----|------|-----|-------|
| ARG | 18 | Side | NH2 | TYR | 116 | Side | OH  | 12.09 |
| ARG | 18 | Main | O   | ARG | 188 | Side | NE  | 35.86 |
| ARG | 18 | Main | O   | ARG | 188 | Side | NH2 | 32.67 |
| ARG | 18 | Main | N   | GLU | 288 | Side | OE1 | 98.60 |
| ARG | 18 | Side | NH2 | GLU | 288 | Main | O   | 28.87 |
| ARG | 18 | Side | NH2 | GLU | 288 | Side | OE2 | 97.80 |
| ARG | 18 | Side | NE  | GLU | 288 | Side | OE2 | 94.01 |
| ARG | 18 | Side | NE  | GLU | 288 | Side | OE1 | 44.46 |
| ARG | 18 | Side | NH2 | GLU | 288 | Side | OE1 | 13.09 |
| VAL | 19 | Main | O   | ARG | 188 | Side | NH2 | 34.97 |
| VAL | 19 | Main | O   | TYR | 190 | Side | OH  | 89.51 |
| TRP | 20 | Side | NE1 | ARG | 188 | Side | NH2 | 86.51 |
| TRP | 20 | Side | NE1 | ARG | 188 | Side | NH2 | 42.26 |
| TRP | 20 | Side | NE1 | HIS | 203 | Side | NE2 | 23.68 |
| TYR | 21 | Side | OH  | MET | 1   | Main | N   | 39.66 |
| TYR | 21 | Side | OH  | ASP | 187 | Side | OD2 | 37.06 |
| TYR | 21 | Side | OH  | ASP | 187 | Side | OD1 | 15.98 |
| TYR | 21 | Side | OH  | ARG | 188 | Main | O   | 20.98 |
| THR | 22 | Side | OG1 | GLU | 277 | Side | OE2 | 60.54 |
| THR | 23 | Main | O   | LYS | 25  | Side | NZ  | 98.50 |
| THR | 23 | Side | OG1 | ASP | 193 | Side | OD2 | 30.97 |
| THR | 23 | Side | OG1 | ASP | 193 | Side | OD1 | 19.28 |
| GLY | 24 | Main | O   | CYS | 28  | Main | N   | 27.47 |
| ILE | 26 | Main | N   | LYS | 25  | Main | O   | 57.04 |
| CYS | 35 | Main | N   | SER | 23  | Main | O   | 37.56 |



## Complex 16:

| V3 loop Residue | Number | Group | Atom | CXCR4 Residue | Number | Group | Atom | Occupancy (%) |
|-----------------|--------|-------|------|---------------|--------|-------|------|---------------|
| ARG             | 3      | Side  | NE   | SER           | 23     | Side  | OG   | 10.19         |
| ARG             | 3      | Side  | NE   | SER           | 23     | Side  | OG   | 9.79          |
| ASN             | 6      | Side  | ND2  | ASN           | 11     | Side  | OD1  | 20.08         |
| ASN             | 7      | Side  | ND2  | ASP           | 22     | Main  | O    | 10.09         |
| ASN             | 7      | Side  | ND2  | SER           | 23     | Main  | O    | 21.88         |
| ASN             | 7      | Side  | OD1  | LYS           | 25     | Main  | N    | 25.67         |
| THR             | 8      | Main  | O    | LYS           | 25     | Main  | N    | 24.18         |
| ARG             | 9      | Side  | NH1  | GLU           | 14     | Side  | OE1  | 62.74         |
| ARG             | 9      | Side  | NH1  | GLU           | 14     | Side  | OE2  | 53.75         |
| ARG             | 9      | Side  | NH2  | ASP           | 20     | Main  | O    | 10.59         |
| ARG             | 9      | Side  | NH1  | ASP           | 193    | Side  | OD2  | 82.32         |
| ARG             | 9      | Side  | NH2  | ASP           | 193    | Side  | OD2  | 61.74         |
| ARG             | 9      | Side  | NH1  | ASP           | 193    | Side  | OD1  | 56.84         |
| ARG             | 9      | Side  | NH2  | ASP           | 193    | Side  | OD1  | 11.89         |
| ARG             | 9      | Side  | NH2  | LEU           | 266    | Main  | O    | 17.38         |
| LYS             | 10     | Side  | NZ   | CYS           | 28     | Main  | O    | 34.07         |
| ARG             | 11     | Side  | NH1  | TYS           | 12     | Side  | OS2  | 43.16         |
| ARG             | 11     | Side  | NH2  | TYS           | 12     | Side  | OS2  | 36.56         |
| ARG             | 11     | Side  | NH1  | TYS           | 12     | Side  | OS3  | 30.57         |
| ARG             | 11     | Side  | NH1  | TYS           | 12     | Side  | OS4  | 23.48         |
| ARG             | 11     | Side  | NH2  | TYS           | 12     | Side  | OS4  | 21.58         |
| ARG             | 11     | Side  | NH2  | TYS           | 12     | Side  | OS3  | 12.59         |
| ARG             | 11     | Side  | NH1  | GLU           | 14     | Side  | OE2  | 68.23         |
| ARG             | 11     | Side  | NE   | GLU           | 14     | Side  | OE2  | 40.76         |
| ARG             | 11     | Side  | NH2  | PRO           | 191    | Main  | O    | 58.54         |
| ARG             | 11     | Side  | NE   | ASP           | 193    | Side  | OD1  | 23.78         |
| ARG             | 11     | Side  | NH1  | ASP           | 193    | Side  | OD1  | 22.98         |
| SER             | 13     | Side  | OG   | ARG           | 188    | Main  | O    | 59.54         |
| LEU             | 14     | Main  | O    | ARG           | 188    | Side  | NH2  | 99.30         |
| LEU             | 14     | Main  | O    | ARG           | 188    | Side  | NE   | 57.34         |
| LEU             | 14     | Main  | N    | GLN           | 200    | Side  | OE1  | 28.77         |
| GLY             | 17     | Main  | O    | SER           | 285    | Side  | OG   | 93.51         |
| GLY             | 17     | Main  | N    | GLU           | 288    | Side  | OE1  | 96.20         |
| GLY             | 17     | Main  | N    | GLU           | 288    | Side  | OE2  | 88.51         |
| ARG             | 18     | Side  | NH2  | ARG           | 30     | Side  | NH2  | 33.47         |
| ARG             | 18     | Side  | NH1  | ARG           | 30     | Side  | NH2  | 31.77         |
| ARG             | 18     | Side  | NH1  | ARG           | 30     | Side  | NH2  | 11.79         |
| ARG             | 18     | Side  | NH2  | ASP           | 181    | Side  | OD2  | 86.51         |
| ARG             | 18     | Side  | NH1  | ASP           | 181    | Side  | OD2  | 26.47         |
| ARG             | 18     | Side  | NH1  | ARG           | 183    | Side  | NH2  | 17.08         |
| ARG             | 18     | Side  | NH1  | ARG           | 183    | Side  | NH2  | 16.38         |
| TYR             | 21     | Main  | O    | MET           | 1      | Main  | N    | 61.44         |
| TYR             | 21     | Main  | N    | MET           | 1      | Side  | SD   | 20.18         |
| TYR             | 21     | Side  | OH   | GLU           | 277    | Main  | O    | 45.35         |
| TYR             | 21     | Side  | OH   | ASN           | 278    | Side  | OD1  | 15.98         |

|     |    |      |     |     |     |      |     |       |
|-----|----|------|-----|-----|-----|------|-----|-------|
| THR | 22 | Side | OG1 | MET | 1   | Main | N   | 96.10 |
| THR | 22 | Side | OG1 | MET | 1   | Main | O   | 20.48 |
| GLN | 25 | Main | N   | THR | 8   | Side | OG1 | 16.18 |
| GLN | 25 | Side | OE1 | SER | 9   | Main | N   | 13.19 |
| GLN | 25 | Main | O   | ASP | 10  | Main | N   | 57.24 |
| GLN | 25 | Main | N   | ASP | 10  | Side | OD2 | 10.69 |
| GLN | 25 | Side | OE1 | ASP | 10  | Main | N   | 19.18 |
| GLN | 25 | Main | O   | ASN | 11  | Main | N   | 70.63 |
| GLN | 25 | Side | OE1 | ASN | 11  | Main | N   | 22.08 |
| GLN | 25 | Side | NE2 | ASN | 11  | Side | OD1 | 37.86 |
| VAL | 27 | Main | N   | TYS | 12  | Main | O   | 70.03 |
| VAL | 27 | Main | N   | GLU | 14  | Side | OE1 | 16.38 |
| VAL | 27 | Main | N   | GLU | 14  | Side | OE2 | 14.99 |
| ASP | 29 | Side | OD1 | SER | 18  | Side | OG  | 11.59 |
| ASP | 29 | Main | N   | SER | 23  | Side | OG  | 71.33 |
| ILE | 30 | Main | N   | ASP | 20  | Side | OD1 | 12.19 |
| ARG | 31 | Side | NH1 | ASP | 20  | Main | O   | 14.69 |
| ARG | 31 | Side | NH1 | ASP | 20  | Side | OD1 | 16.78 |
| ARG | 31 | Side | NH1 | ASP | 20  | Side | OD2 | 15.38 |
| ARG | 31 | Side | NH2 | TYS | 21  | Main | O   | 16.58 |
| ARG | 31 | Side | NH1 | GLU | 268 | Side | OE1 | 73.13 |
| ARG | 31 | Side | NH2 | GLU | 268 | Side | OE1 | 72.23 |
| ARG | 31 | Side | NH2 | GLU | 268 | Side | OE2 | 70.53 |
| ARG | 31 | Side | NH1 | GLU | 268 | Side | OE2 | 41.66 |
| LYS | 32 | Side | NZ  | ASP | 22  | Side | OD1 | 55.54 |
| LYS | 32 | Side | NZ  | ASP | 22  | Side | OD2 | 37.56 |

## Complex 17:

| V3 loop Residue | Number | Group | Atom | CXCR4 Residue | Number | Group | Atom | Occupancy (%) |
|-----------------|--------|-------|------|---------------|--------|-------|------|---------------|
| ARG             | 3      | Side  | NH2  | TYS           | 21     | Main  | O    | 27.47         |
| ARG             | 3      | Side  | NH1  | TYS           | 21     | Main  | O    | 14.79         |
| ARG             | 3      | Side  | NH2  | ASP           | 22     | Main  | O    | 40.36         |
| ARG             | 3      | Side  | NH2  | SER           | 23     | Main  | O    | 10.49         |
| ARG             | 9      | Side  | NH2  | TYS           | 12     | Side  | OS3  | 19.28         |
| ARG             | 9      | Side  | NH2  | TYS           | 12     | Side  | OS2  | 13.09         |
| ARG             | 9      | Side  | NH2  | ASP           | 193    | Side  | OD1  | 22.28         |
| ARG             | 9      | Side  | NE   | ASP           | 193    | Side  | OD1  | 11.99         |
| LYS             | 10     | Side  | NZ   | GLU           | 2      | Side  | OE1  | 41.66         |
| LYS             | 10     | Side  | NZ   | GLU           | 2      | Side  | OE2  | 40.36         |
| LYS             | 10     | Main  | O    | LYS           | 25     | Side  | NZ   | 68.73         |
| ARG             | 11     | Side  | NH2  | TYS           | 12     | Side  | OS2  | 90.81         |
| ARG             | 11     | Side  | NH2  | TYS           | 12     | Side  | OS4  | 44.76         |
| ARG             | 11     | Side  | NH2  | TYS           | 12     | Side  | OS3  | 19.28         |
| ARG             | 11     | Side  | NH2  | ASP           | 193    | Side  | OD1  | 93.91         |
| SER             | 13     | Side  | OG   | ASP           | 187    | Side  | OD2  | 99.20         |
| SER             | 13     | Side  | OG   | ASP           | 187    | Side  | OD1  | 60.94         |
| SER             | 13     | Side  | OG   | PHE           | 189    | Main  | N    | 72.23         |
| SER             | 13     | Side  | OG   | PHE           | 189    | Main  | N    | 68.63         |
| SER             | 13     | Side  | OG   | TYR           | 190    | Main  | N    | 87.41         |
| LEU             | 14     | Main  | O    | ARG           | 188    | Side  | NE   | 91.81         |
| LEU             | 14     | Main  | O    | ARG           | 188    | Side  | NH2  | 88.91         |
| GLY             | 17     | Main  | N    | TYR           | 45     | Side  | OH   | 16.68         |
| GLY             | 17     | Main  | O    | SER           | 285    | Side  | OG   | 80.62         |
| GLY             | 17     | Main  | N    | GLU           | 288    | Side  | OE1  | 95.70         |
| GLY             | 17     | Main  | N    | GLU           | 288    | Side  | OE2  | 84.92         |
| ARG             | 18     | Side  | NH1  | ASP           | 181    | Side  | OD1  | 91.51         |
| ARG             | 18     | Side  | NH2  | ASP           | 181    | Side  | OD1  | 85.71         |
| ARG             | 18     | Side  | NH2  | HIS           | 281    | Side  | NE2  | 47.75         |
| ARG             | 18     | Side  | NE   | HIS           | 281    | Side  | NE2  | 46.75         |
| ARG             | 18     | Side  | NH2  | HIS           | 281    | Side  | ND1  | 29.27         |
| TRP             | 20     | Side  | NE1  | ARG           | 183    | Side  | NH2  | 27.47         |
| TRP             | 20     | Side  | NE1  | ARG           | 183    | Side  | NH2  | 25.57         |
| TRP             | 20     | Side  | NE1  | ARG           | 183    | Side  | NH1  | 9.59          |
| TYR             | 21     | Main  | N    | ASP           | 181    | Side  | OD2  | 19.18         |
| TYR             | 21     | Main  | N    | ASP           | 181    | Side  | OD1  | 14.99         |
| TYR             | 21     | Side  | OH   | GLU           | 277    | Side  | OE2  | 46.05         |
| TYR             | 21     | Side  | OH   | GLU           | 277    | Side  | OE1  | 34.97         |
| TYR             | 21     | Side  | OH   | ASN           | 278    | Side  | ND2  | 12.59         |
| TYR             | 21     | Side  | OH   | HIS           | 281    | Side  | ND1  | 10.79         |
| THR             | 22     | Side  | OG1  | TYR           | 190    | Main  | O    | 91.91         |
| THR             | 23     | Main  | O    | MET           | 1      | Main  | N    | 94.91         |
| THR             | 23     | Main  | N    | MET           | 1      | Main  | O    | 39.96         |
| THR             | 23     | Side  | OG1  | GLU           | 2      | Side  | OE2  | 47.95         |
| THR             | 23     | Side  | OG1  | GLU           | 2      | Side  | OE1  | 46.25         |

|     |    |      |     |     |     |      |     |       |
|-----|----|------|-----|-----|-----|------|-----|-------|
| GLN | 25 | Side | NE2 | SER | 9   | Side | OG  | 37.66 |
| GLN | 25 | Main | O   | ASN | 11  | Side | ND2 | 24.38 |
| GLN | 25 | Side | OE1 | ASN | 11  | Side | ND2 | 34.67 |
| GLN | 25 | Side | NE2 | ASN | 11  | Side | OD1 | 19.48 |
| GLN | 25 | Main | O   | TYS | 12  | Main | N   | 57.84 |
| ILE | 26 | Main | O   | ASN | 11  | Side | ND2 | 11.89 |
| VAL | 27 | Main | N   | ASN | 11  | Side | OD1 | 10.89 |
| VAL | 27 | Main | N   | TYS | 12  | Main | O   | 52.95 |
| GLY | 28 | Main | N   | GLU | 14  | Side | OE2 | 17.28 |
| GLY | 28 | Main | N   | GLU | 14  | Side | OE1 | 11.09 |
| ARG | 31 | Side | NH1 | GLU | 14  | Side | OE1 | 34.07 |
| ARG | 31 | Side | NH1 | GLU | 14  | Side | OE2 | 22.28 |
| ARG | 31 | Side | NH2 | GLU | 14  | Side | OE1 | 20.08 |
| ARG | 31 | Side | NH2 | SER | 18  | Side | OG  | 11.59 |
| ARG | 31 | Side | NH2 | SER | 18  | Side | OG  | 11.59 |
| ARG | 31 | Side | NH2 | ASP | 20  | Side | OD1 | 87.21 |
| ARG | 31 | Side | NH1 | ASP | 20  | Side | OD2 | 79.12 |
| ARG | 31 | Side | NH2 | ASP | 20  | Side | OD2 | 58.34 |
| ARG | 31 | Side | NH1 | ASP | 20  | Side | OD1 | 35.06 |
| LYS | 32 | Side | NZ  | GLU | 268 | Side | OE1 | 77.42 |
| LYS | 32 | Side | NZ  | GLU | 268 | Side | OE2 | 62.34 |

**Supporting Table 4:** The table consists of three individual panels divided by thick black frames. The left panel presents the average interaction energy per V3 loop residue in descending order, by summing up the interaction energies of the specific residue with all of its possible CXCR4 interacting residues. The middle and right panels present the (%) residue propensity per V3 loop position for all 35-residue CXCR4 and CXCR/CCR5 V3 loops, respectively, deposited in the Los Alamos National Laboratory database (<http://www.hiv.lanl.gov>). All values have been computed by analysis of 1000 snapshots, extracted from the 20-ns simulation of complex 1 at 20-ps intervals.

| Residue | Interaction Free Energies per V3-loop residue (kcal/mol) |         |           | Residue (%) Propensity for CXCR4 V3 loops |            |            |            | Residue (%) Propensity for CXCR4/CCR5 V3 loops |            |            |            |
|---------|----------------------------------------------------------|---------|-----------|-------------------------------------------|------------|------------|------------|------------------------------------------------|------------|------------|------------|
|         | Total                                                    | Polar   | Non-Polar | Residue 1:                                | Residue 2: | Residue 3: | Residue 4: | Residue 1:                                     | Residue 2: | Residue 3: | Residue 4: |
| Arg18   | -124.03                                                  | -111.61 | -12.42    | Arg(60)                                   | Gln(31)    | Lys(4)     | Gly(2)     | Arg(57)                                        | Gln(35)    | Gly(2)     | Lys(2)     |
| Lys10   | -57.74                                                   | -42.30  | -15.44    | Lys(63)                                   | Arg(15)    | Thr(12)    | Gln(7)     | Lys(68)                                        | Arg(15)    | Gln(9)     | Thr(6)     |
| Arg3    | -42.21                                                   | -37.32  | -4.89     | Arg(100)                                  | Ile(0)     | Met(0)     | Ser(0)     | Arg(100)                                       | Ile(0)     | Met(0)     | Ser(0)     |
| Arg31   | -37.87                                                   | -29.54  | -8.33     | Arg(96)                                   | Lys(2)     | Gly(1)     | Ile(1)     | Arg(98)                                        | Ile(1)     | Lys(1)     | Val(0)     |
| Arg11   | -37.58                                                   | -15.91  | -21.67    | Ser(42)                                   | Arg(30)    | Gly(24)    | Asp(1)     | Ser(47)                                        | Gly(27)    | Arg(22)    | Asp(1)     |
| Arg9    | -32.58                                                   | -16.99  | -15.59    | Arg(88)                                   | Ile(4)     | Lys(3)     | Ala(2)     | Arg(89)                                        | Ala(3)     | Ile(3)     | Lys(3)     |
| Trp20   | -28.95                                                   | -8.94   | -20.01    | Phe(59)                                   | Trp(10)    | Val(9)     | Leu(8)     | Phe(60)                                        | Trp(10)    | Leu(9)     | Val(8)     |
| Leu14   | -27.42                                                   | -7.00   | -20.42    | Ile(65)                                   | Leu(18)    | Met(11)    | Ala(1)     | Ile(70)                                        | Leu(16)    | Met(10)    | Ala(1)     |
| Lys32   | -26.28                                                   | -24.74  | -1.54     | Gln(50)                                   | Lys(31)    | Arg(18)    | Ile(0)     | Gln(55)                                        | Lys(28)    | Arg(15)    | His(1)     |
| Tyr21   | -19.79                                                   | -2.61   | -17.18    | Tyr(82)                                   | Phe(8)     | His(6)     | Ser(2)     | Tyr(81)                                        | Phe(10)    | His(7)     | Val(0)     |
| Pro16   | -13.58                                                   | -0.73   | -12.85    | Pro(91)                                   | Gln(4)     | Gly(2)     | Leu(1)     | Pro(94)                                        | Gln(3)     | Gly(2)     | Ala(0)     |
| Gly15   | -12.67                                                   | -6.48   | -6.20     | Gly(95)                                   | Ile(2)     | Ser(2)     | Ala(0)     | Gly(97)                                        | Ile(2)     | Ser(1)     | Ala(0)     |
| Ser13   | -12.49                                                   | -6.72   | -5.77     | Arg(29)                                   | His(27)    | Thr(15)    | Ser(14)    | His(35)                                        | Arg(28)    | Thr(12)    | Ser(10)    |
| Asn5    | -12.48                                                   | -6.14   | -6.34     | Asn(60)                                   | Gly(17)    | Ser(11)    | Tyr(6)     | Asn(62)                                        | Gly(20)    | Ser(11)    | Tyr(5)     |
| Gly17   | -12.11                                                   | -6.12   | -6.00     | Gly(96)                                   | Pro(1)     | Gln(1)     | Arg(1)     | Gly(97)                                        | Pro(1)     | Arg(1)     | Ala(0)     |
| Gln25   | -11.96                                                   | -1.05   | -10.91    | Asp(21)                                   | Glu(19)    | Gln(18)    | Arg(12)    | Asp(22)                                        | Glu(18)    | Gln(14)    | Lys(13)    |
| Gly24   | -11.49                                                   | -4.43   | -7.07     | Gly(66)                                   | Glu(8)     | Arg(7)     | Thr(6)     | Gly(68)                                        | Glu(8)     | Thr(7)     | Lys(4)     |
| Val12   | -10.31                                                   | 0.50    | -10.82    | Ile(56)                                   | Val(29)    | Thr(5)     | Leu(4)     | Ile(59)                                        | Val(29)    | Thr(6)     | Phe(2)     |
| Thr8    | -10.22                                                   | -1.96   | -8.26     | Thr(84)                                   | Ile(9)     | Lys(3)     | Met(1)     | Thr(92)                                        | Ile(4)     | Lys(1)     | Arg(1)     |
| Val19   | -9.52                                                    | -0.98   | -8.53     | Ala(49)                                   | Val(28)    | Thr(15)    | Arg(2)     | Ala(50)                                        | Val(23)    | Thr(21)    | Tyr(2)     |
| Thr22   | -8.33                                                    | -1.94   | -6.4      | Thr(43)                                   | Ala(40)    | Lys(7)     | Arg(5)     | Ala(48)                                        | Thr(42)    | Arg(3)     | His(2)     |
| Thr23   | -8.32                                                    | -0.19   | -8.13     | Thr(87)                                   | Ala(6)     | Met(2)     | His(1)     | Thr(86)                                        | Ala(7)     | Arg(2)     | Ser(2)     |
| Asn6    | -7.40                                                    | -3.53   | -3.87     | Asn(90)                                   | Lys(4)     | Tyr(2)     | Asp(1)     | Asn(95)                                        | Asp(1)     | Glu(1)     | Lys(1)     |
| Val27   | -6.38                                                    | -0.22   | -6.15     | Ile(71)                                   | Val(13)    | Thr(11)    | Glu(1)     | Ile(80)                                        | Val(12)    | Thr(7)     | Met(1)     |
| Ile26   | -5.90                                                    | -0.33   | -5.57     | Ile(95)                                   | Val(3)     | Gly(1)     | Lys(1)     | Ile(95)                                        | Val(3)     | Gly(1)     | Lys(0)     |
| Asn7    | -4.90                                                    | -2.14   | -2.76     | Asn(84)                                   | Lys(5)     | Tyr(3)     | Thr(2)     | Asn(93)                                        | Lys(2)     | Tyr(2)     | Ile(1)     |
| His34   | -2.99                                                    | -0.71   | -2.28     | His(65)                                   | Tyr(34)    | Arg(0)     | Ile(0)     | His(72)                                        | Tyr(27)    | Val(0)     | His(0)     |
| Cys1    | -0.71                                                    | -0.68   | -0.04     | Cys(100)                                  | -          | -          | -          | Cys(100)                                       | -          | -          | -          |
| Pro4    | -0.67                                                    | -0.07   | -0.61     | Pro(100)                                  | Ile(0)     | Met(0)     | Ser(0)     | Pro(100)                                       | Ile(0)     | Met(0)     | Ser(0)     |
| Ile30   | -0.44                                                    | -0.15   | -0.29     | Ile(96)                                   | Met(1)     | Asn(1)     | Thr(1)     | Ile(97)                                        | Asn(1)     | Thr(1)     | Val(1)     |
| Gly28   | -0.32                                                    | 0.06    | -0.38     | Gly(99)                                   | Lys(1)     | Thr(0)     | Glu(0)     | Gly(99)                                        | Lys(1)     | Thr(0)     | Met(0)     |
| Thr2    | -0.19                                                    | -0.03   | -0.16     | Thr(79)                                   | Ile(9)     | Met(3)     | Ser(3)     | Thr(74)                                        | Ile(12)    | Met(4)     | Ser(4)     |
| Ala33   | -0.16                                                    | 0.02    | -0.18     | Ala(98)                                   | Pro(1)     | Arg(0)     | Ile(0)     | Ala(98)                                        | Pro(1)     | Val(1)     | His(0)     |
| Cys35   | 0.98                                                     | 1.03    | -0.06     | Cys(100)                                  | -          | -          | -          | Cys(100)                                       | -          | -          | -          |
| Asp29   | 1.04                                                     | 1.25    | -0.21     | Asp(83)                                   | Asn(11)    | Tyr(2)     | Gly(1)     | Asp(85)                                        | Asn(13)    | Gly(1)     | Met(0)     |

Left panel: The interaction energies are decomposed into polar and non-polar components. Middle and right panels: The four most probable V3 loop residues per position (according to the descending order of the left panel) are presented, and the corresponding residue propensity is

shown in parenthesis. If a residue in the middle and right panels, matches the corresponding residue of the left panel (V3 loop of this study), it is highlighted in grey background. If a residue in the middle and right panels, possesses similar physicochemical properties to the corresponding residue of left panel (V3 loop of this study), it is highlighted in light green background.

## Supporting Coordinates

The MD coordinates, extracted every 2 are provided as Supporting Information in PDB format. The structures are aligned with regard to the backbone of the CXCR4 intramembrane helical region. The correspondence of PDB files and time in the MD simulation is as follows:

| PDB file            | Time (ns) |
|---------------------|-----------|
| v3loop_cxcr4.1.pdb  | 2         |
| v3loop_cxcr4.2.pdb  | 4         |
| v3loop_cxcr4.3.pdb  | 6         |
| v3loop_cxcr4.4.pdb  | 8         |
| v3loop_cxcr4.5.pdb  | 10        |
| v3loop_cxcr4.6.pdb  | 12        |
| v3loop_cxcr4.7.pdb  | 14        |
| v3loop_cxcr4.8.pdb  | 16        |
| v3loop_cxcr4.9.pdb  | 18        |
| v3loop_cxcr4.10.pdb | 20        |

## Supporting Video

A video demonstrating the simulation trajectory of the V3 loop : CXCR4 complex structure, and depicting the gradual stabilization and preservation of the key salt bridges is provided as Supporting Video.

The V3 loop is shown in tube and in red color, and its 16-20 residue moiety is shown in fat tube representation. The CXCR4 is shown in light gray transparent tube representation. The salt bridge and hydrogen bonds in panels (A) and (B) are denoted in dashed lines, the corresponding heavy atom distances are denoted in Å, and the participating V3 loop and CXCR4 residue moieties are shown in licorice. The C $\alpha$  atoms of V3 loop and CXCR4 salt bridge participating residues are annotated. Hydrogen atoms are omitted for clarity and the V3 loop disulfide bridge is shown in fat transparent licorice representation.

## Supporting References

---

1. Haberthür, U., and A. J. Caflisch. 2008. FACTS: Fast analytical continuum treatment of solvation. *J. Comput Chem* 29:701–715.
2. Neria, E., S. Fischer, and M. Karplus. 1996. Simulation of Activation Free Energies in Molecular Systems. *J. Chem. Phys.* 105:1902-1921.
3. Ryckaert J.P., G.Ciccotti, and H.J.C. Berendsen. Numerical integration of the Cartesian Equations of Motion of a System with Constraints: Molecular Dynamics of n-Alkanes. *J. Comput. Phys.* 23:327-341.
4. MacKerell, A. D. Jr, D. Bashford, M. Bellott, R. L. Dunbrack Jr, J. D. Evanseck, M. J. Field, S. Fischer, J. Gao, H. Guo, , S. Ha, D. Joseph-McCarthy, L. Kuchnir, , K. Kuczera, F. T. K. Lau, C. Mattos, S. Michnick, T. Ngo, D. T. Nguyen, B. Prodhom, W. E. Reiher III, B. Roux, M. Schlenkrich, , J. C. Smith, R. Stote, J. Straub, M. Watanabe, J. Wiorkiewicz-Kuczera, D. Yin, and M. Karplus. 1998. All-atom empirical potential for molecular modeling and dynamics Studies of proteins. *J. Phys. Chem. B* 102:3586-3616.
5. Buck, M., S. Bouguet-Bonnet, R. W. Pastor, and A. D. MacKerell. 2005. Importance of the CMAP correction to the CHARMM22 protein force field: Dynamics of Hen Lysozyme. *Biophys. J.* 90, L36-38.
6. Vanommeslaeghe K., E. Hatcher, C. Acharya, S. Kundu, S. Zhong, J. Shim, E. Darian, O. Guvench, P. Lopes, I. Vorobyov, and A. D. MacKerell Jr. 2010. CHARMM General Force Field (CGenFF): "A force field for drug-like molecules compatible with the CHARMM all-atom additive biological force fields", *J. Comput. Chem.* 31:671-690.
7. Seeber, M., M. Cecchini, F. Rao, G. Settanni, and A. Caflisch. 2007. WORDOM: A program for efficient analysis of molecular dynamics simulations. *Bioinformatics* 23, 2625-2627.
8. Brooks, B. R., C. L. Brooks, III, A. D. Mackerell Jr., L. Nilsson, R. J. Petrella, B. Roux, Y. Won, G. Archontis, C. Bartels, S. Boresch, , A. Caflisch, L. Caves, Q. Cui, A. R. Dinner, M. Feig, S. Fischer, J. Gao, M. Hodoscek, W. Im, K. Kuczera, T. Lazaridis, J. Ma, V. Ovchinnikov, E. Paci, R. W. Pastor, C. B. Post, J. Z. Pu, M. Schaefer, B. Tidor, R. M. Venable, H. L. Woodcock, X. Wu, W. Yang, D. M. York, and M. J. Karplus. 2009. CHARMM: the biomolecular simulation program. *J. Comput. Chem.* 30:1545–1614.



- 
9. Pierce, B. G., Y. Hourai, Z. Weng. 2011. Accelerating protein docking in ZDOCK using an advanced 3D convolution library. *PLoS One* 6:e24657.
10. Wu, B., E. Y. T. Chien, C. D. Mol, G. Fenalti, W. Liu, V. Katritch, R. Abagyan, A. Brooun, P. Wells, F. C. Bi, D. J. Hamel, P. Kuhn, T. M. Handel, V. Cherezov, and R. C. Stevens. 2010. Structures of the CXCR4 chemokine GPCR with small-molecule and cyclic peptide antagonist. *Science* 330: 1066-1071.
